# Supplementary material for: Nervisides I–J: Unconventional Side-Chain-Bearing Cycloartane Glycosides from Nervilia concolor
Source: PubMed Central journal article supplement (PMC6681409; doi:10.3390/molecules24142599), 2019-07-17
Supplement: molecules-24-02599-s001.pdf [file molecules-24-02599-s001.pdf]

# Supplementary Material Of

## Nervisides I-J: Unconventional Side Chain-Bearing Cycloartane Glycosides From *Nervilia concolor*

Thi-Ngoc-Mai Tran<sup>1,2</sup>, Guillaume Bernadat<sup>3</sup>, Dinh-Tri Mai<sup>1,4</sup>, Van-Kieu Nguyen<sup>5</sup>, Jirapast Sichaem<sup>6</sup>, Tan-Phat Nguyen<sup>1,4</sup>, Cong-Luan Tran<sup>1,7</sup>, Phuong-Vy Do<sup>8</sup>, Nguyen-Minh-An Tran<sup>9</sup>, Huu-Hung Nguyen<sup>10</sup>, Mehdi A. Beniddir<sup>3</sup>, Thuc-Huy Duong<sup>11,12\*,†</sup> and Pierre Le Pogam<sup>3,\*,†</sup>

<sup>1</sup> Graduate University of Science and Technology, Vietnam Academy of Science and Technology, 18 Hoang Quoc Viet, Cau Giay, Ha Noi, Vietnam

<sup>2</sup> Ho Chi Minh city University of Technology (HUTECH), Ho Chi Minh City, Vietnam

<sup>3</sup> Équipe “Pharmacognosie–Chimie des Substances Naturelles”, BioCIS, Univ. Paris-Sud, CNRS, Université Paris-Saclay, 5 Rue Jean-Baptiste Clément, 92290 Châtenay-Malabry, France; pierre.le-pogam-alluard@u-psud.fr

<sup>4</sup> Institute of Chemical Technology, Vietnam Academy of Science and Technology, 01 Mac Dinh Chi, Ho Chi Minh City, Vietnam

<sup>5</sup> Center of Excellence in Natural Products Chemistry, Department of Chemistry, Faculty of Science, Chulalongkorn University, Pathumwan, Bangkok 10330, Thailand

<sup>6</sup> Faculty of Science and Technology, Thammasat University Lampang Campus, Lampang 52190, Thailand

<sup>7</sup> Mien Dong University of Technology, MUT, Dong Nai Province, Vietnam

<sup>8</sup> Ho Chi Minh City University of Technology (HCMUT), Ho Chi Minh City, Vietnam.

<sup>9</sup> Industrial University of Ho Chi Minh City, Ho Chi Minh City, Vietnam

<sup>10</sup> Faculty of Biotechnology, Nguyen Tat Thanh University, 300A Nguyen Tat Thanh Str., Dist. 4, Ho Chi Minh City, Vietnam

<sup>11</sup> Department for Management of Science and Technology Development, Ton Duc Thang University, Ho Chi Minh City, Vietnam; duongthuchuy@tdtu.edu.vn (T.D.H.)

<sup>12</sup> Faculty of Applied Sciences, Ton Duc Thang University, Ho Chi Minh City, Vietnam.

† These authors contributed equally to this work.

\* Correspondence: pierre.le-pogam-alluard@u-psud.fr, duongthuchuy@tdtu.edu.vn

|                                            |
|--------------------------------------------|
| Summary of the Supporting Material content |
|--------------------------------------------|

S1 HRESIMS of **1**S2 <sup>1</sup>H-NMR spectrum of **1** (500 MHz, DMSO-*d*<sub>6</sub>)S3 <sup>13</sup>C-NMR spectrum of **1** (125 MHz, DMSO-*d*<sub>6</sub>)S4 COSY spectrum of **1** (500 MHz, DMSO-*d*<sub>6</sub>)S5 HSQC spectrum of **1** (500/125 MHz, DMSO-*d*<sub>6</sub>)S6 HSQC spectrum of **1** (500/125 MHz, DMSO-*d*<sub>6</sub>)S7 HMBC spectrum of **1** (500/125 MHz, DMSO-*d*<sub>6</sub>)S8 HMBC spectrum of **1** (500/125 MHz, DMSO-*d*<sub>6</sub>)S9 NOESY spectrum of **1** (500 MHz, DMSO-*d*<sub>6</sub>)S10 <sup>13</sup>C-NMR spectrum of **1** (125 MHz, pyridine-*d*<sub>5</sub>)S11 <sup>13</sup>C-NMR spectrum of **1** (125 MHz, pyridine-*d*<sub>5</sub>)S12 HRESIMS of **2**S13 <sup>1</sup>H-NMR spectrum of **2** (500 MHz, DMSO-*d*<sub>6</sub>)S14 <sup>13</sup>C-NMR spectrum of **2** (125 MHz, DMSO-*d*<sub>6</sub>)S15 COSY spectrum of **1** (500 MHz, DMSO-*d*<sub>6</sub>)S16 HSQC spectrum of **2** (500/125 MHz, DMSO-*d*<sub>6</sub>)S17 HSQC spectrum of **2** (500/125 MHz, DMSO-*d*<sub>6</sub>)S18 HMBC spectrum of **2** (500/125 MHz, DMSO-*d*<sub>6</sub>)S19 HMBC spectrum of **2** (500/125 MHz, DMSO-*d*<sub>6</sub>)S20 NOESY spectrum of **2** (500 MHz, DMSO-*d*<sub>6</sub>)S21. DFT calculations results for 24R and 24S epimers of **1** and <sup>13</sup>C NMR Spectroscopic Data (125 MHz) for **1** in DMSO-*d*<sub>6</sub> (δ in ppm)

S22. Atomic Coordinates (Ångstroms) of Nerviside I and Epinerviside I



S2. <sup>1</sup>H NMR spectrum of **1** (500 MHz, DMSO-*d*<sub>6</sub>)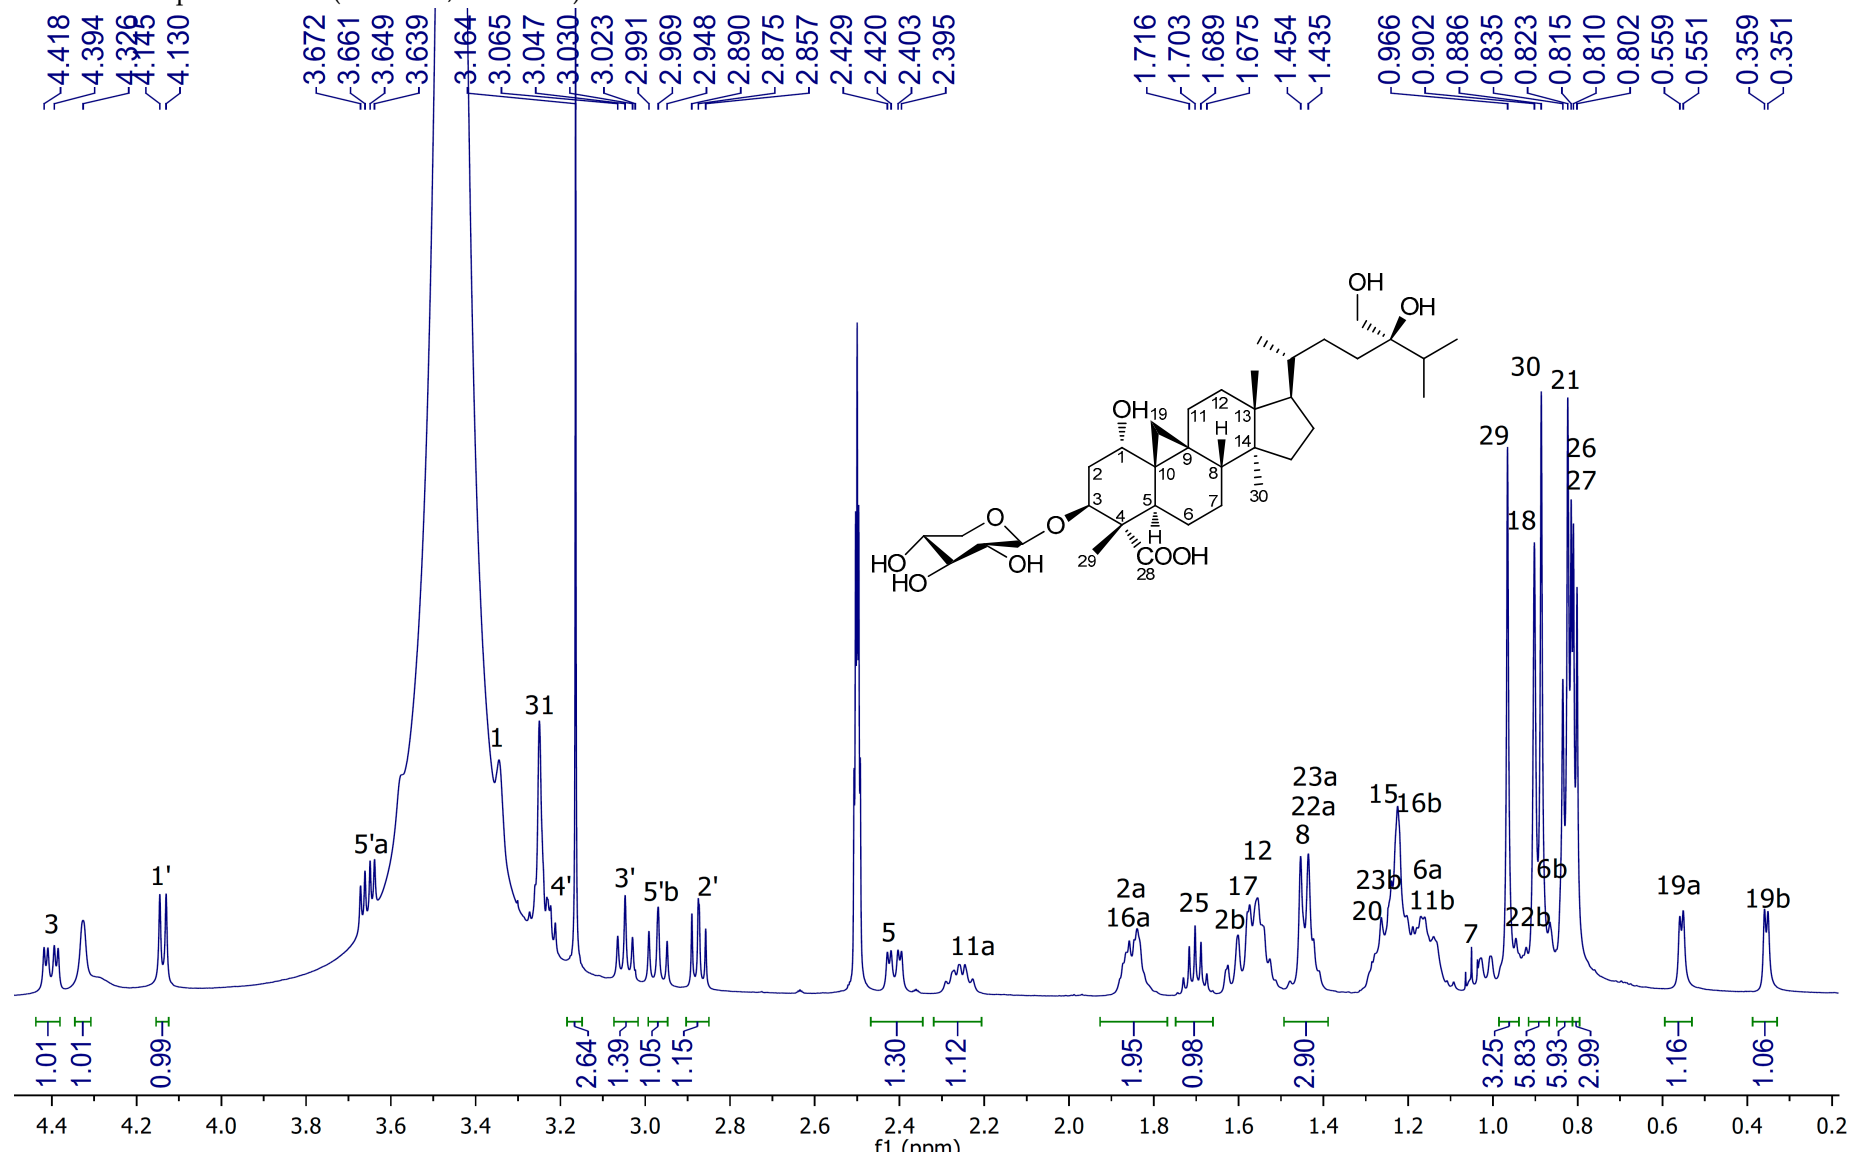

S3. <sup>13</sup>C-NMR spectrum of 1 (125 MHz, DMSO-d<sub>6</sub>)

110TRI\_NA5A  
NA5A-DMSO-C13CPD

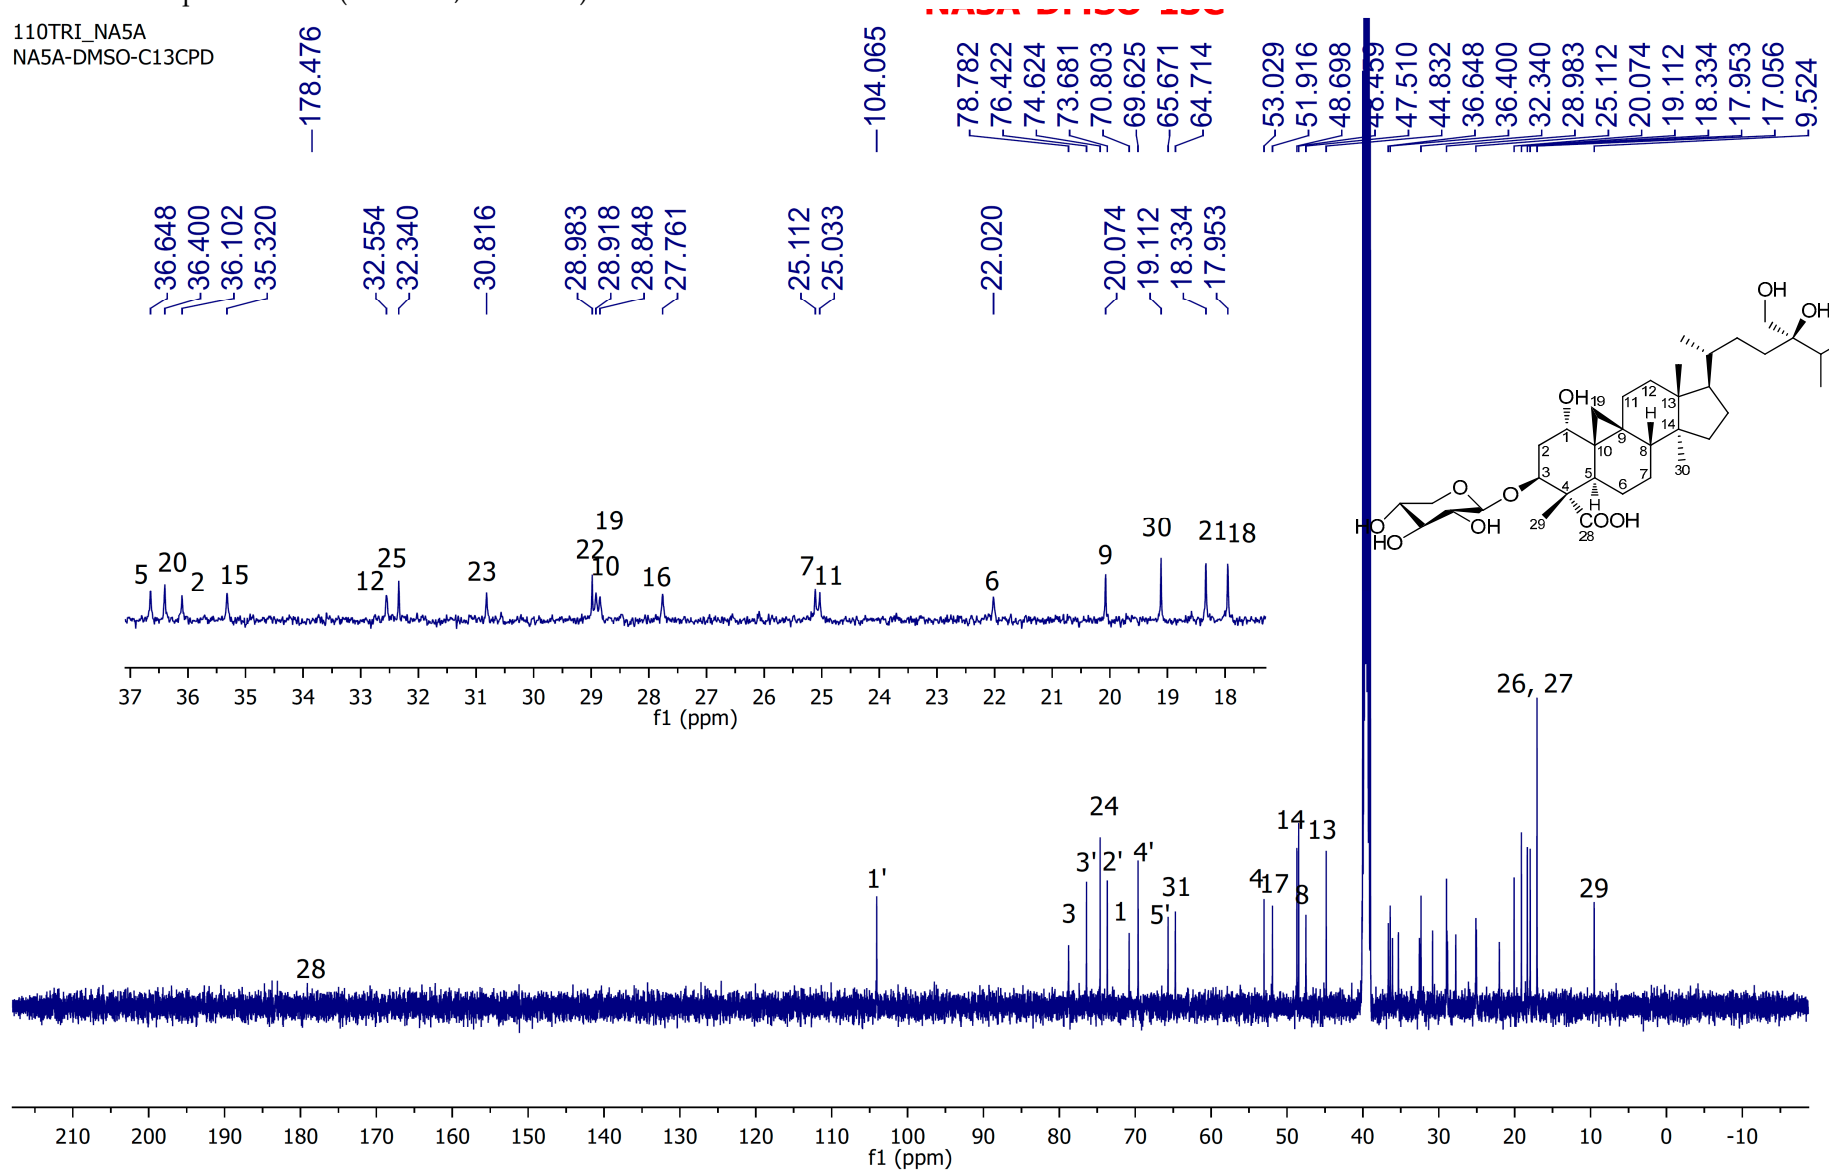



S5. HSQC spectrum of **1** (500/125 MHz, DMSO-*d*<sub>6</sub>)

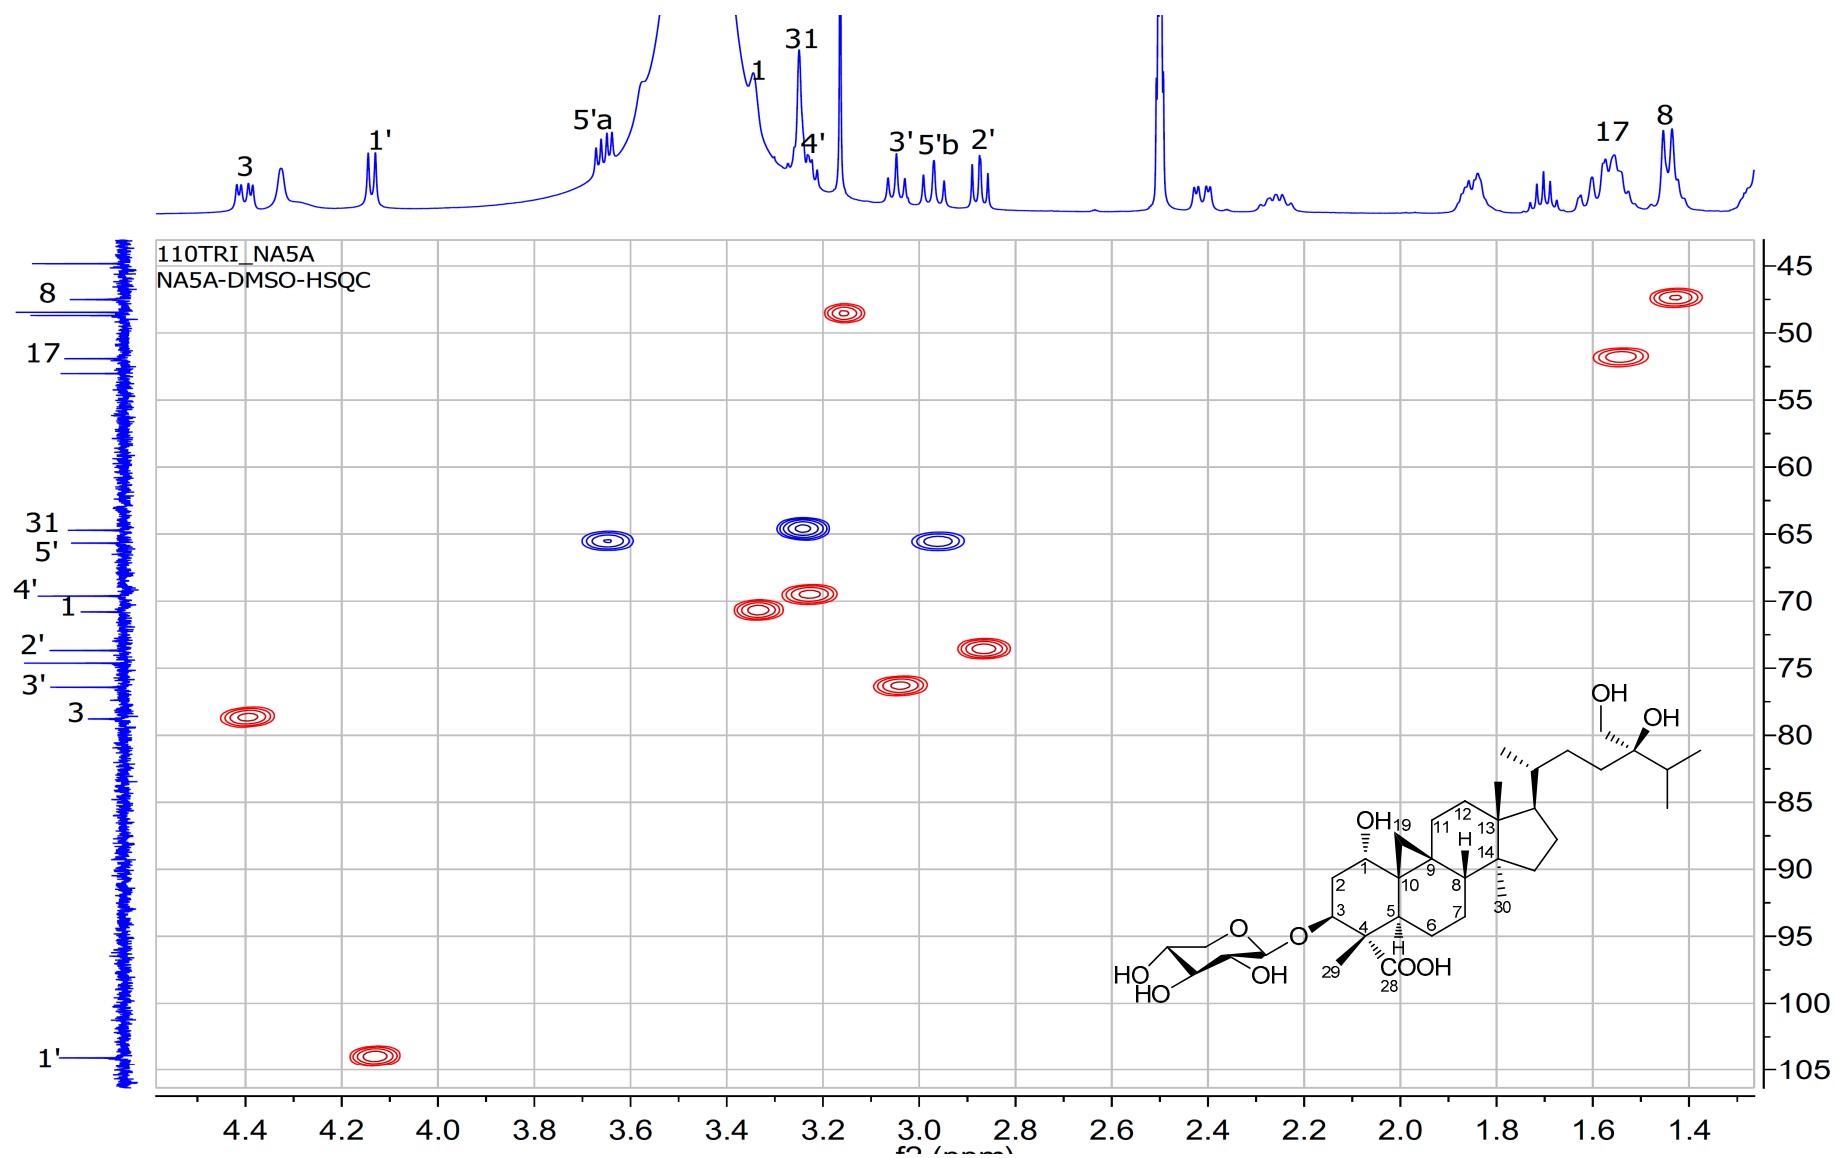

S6. HSQC spectrum of **1** (500/125 MHz, DMSO-*d*<sub>6</sub>)

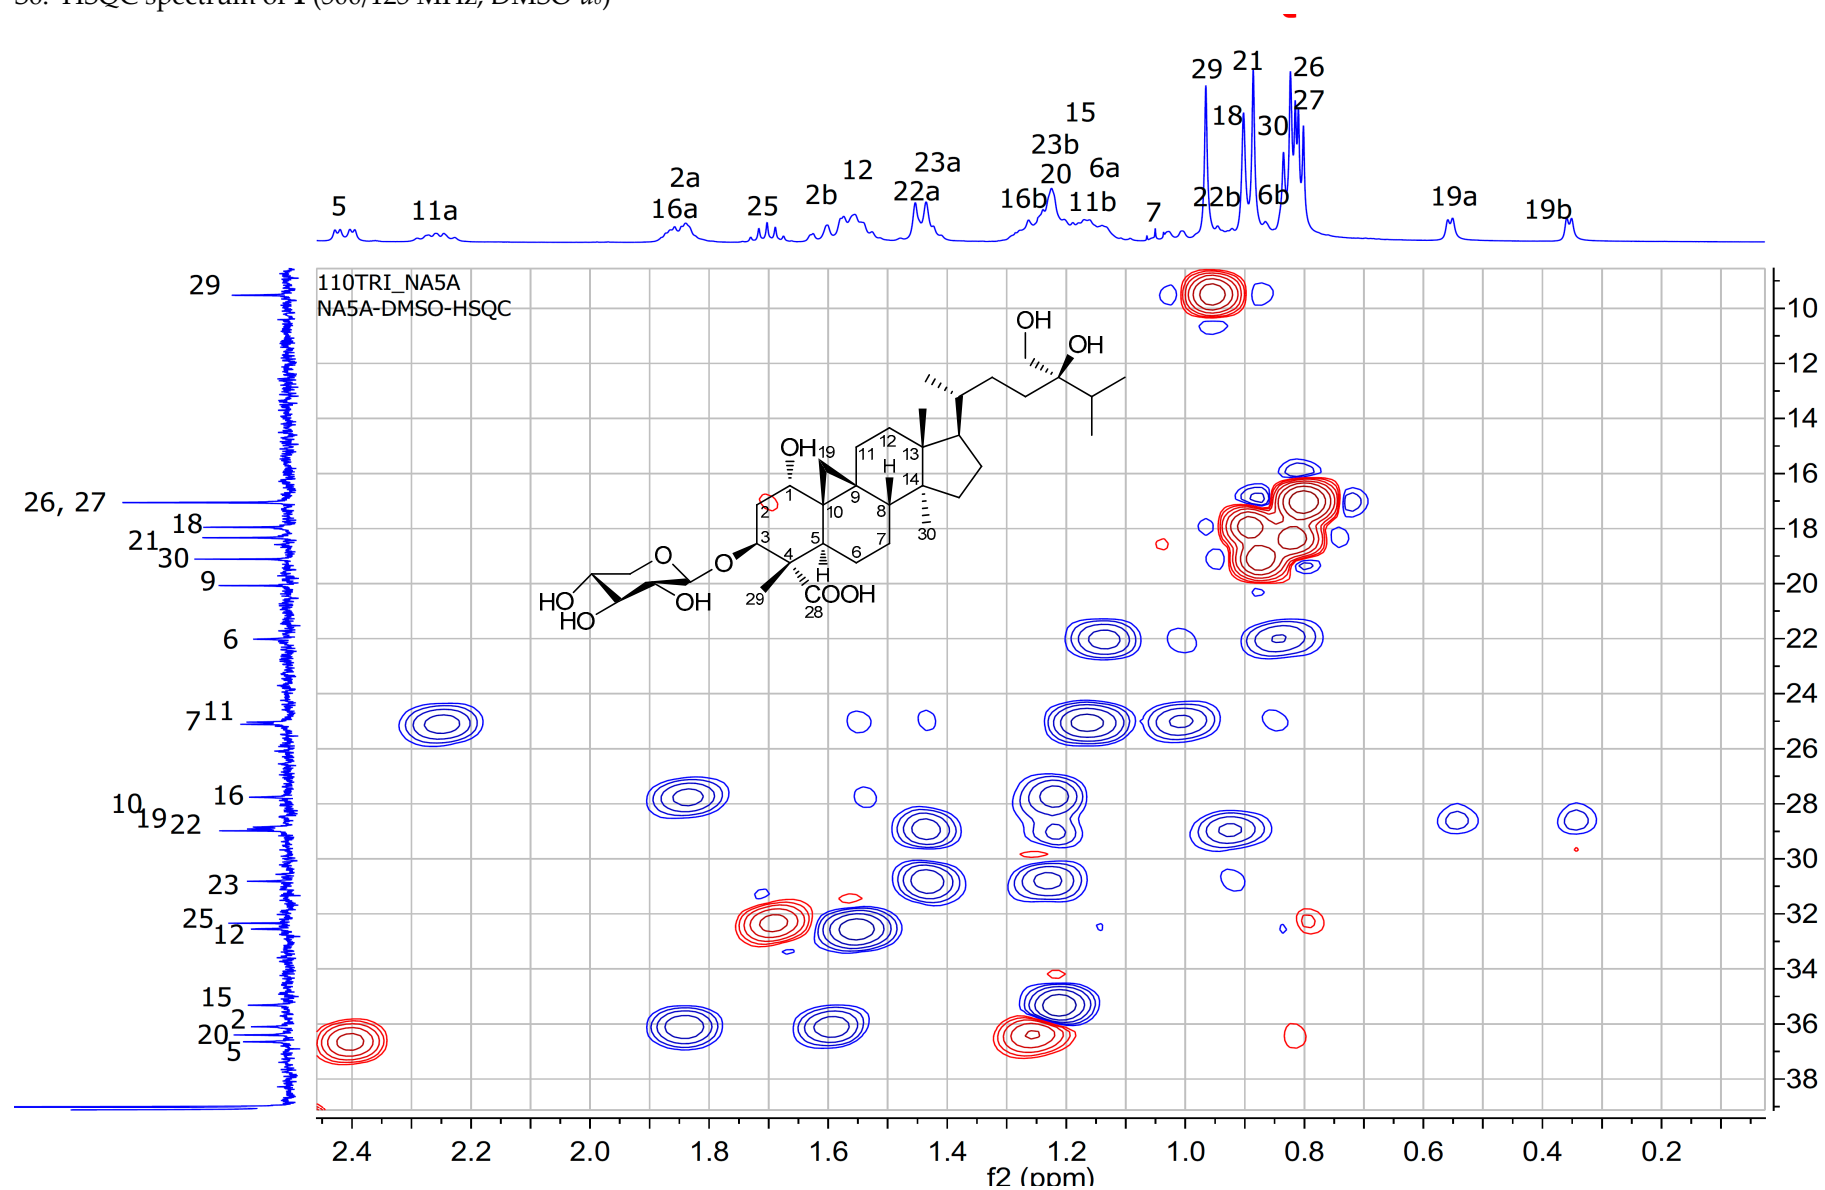



S7. HMBC spectrum of 1 (500/125 MHz, DMSO- $d_6$ )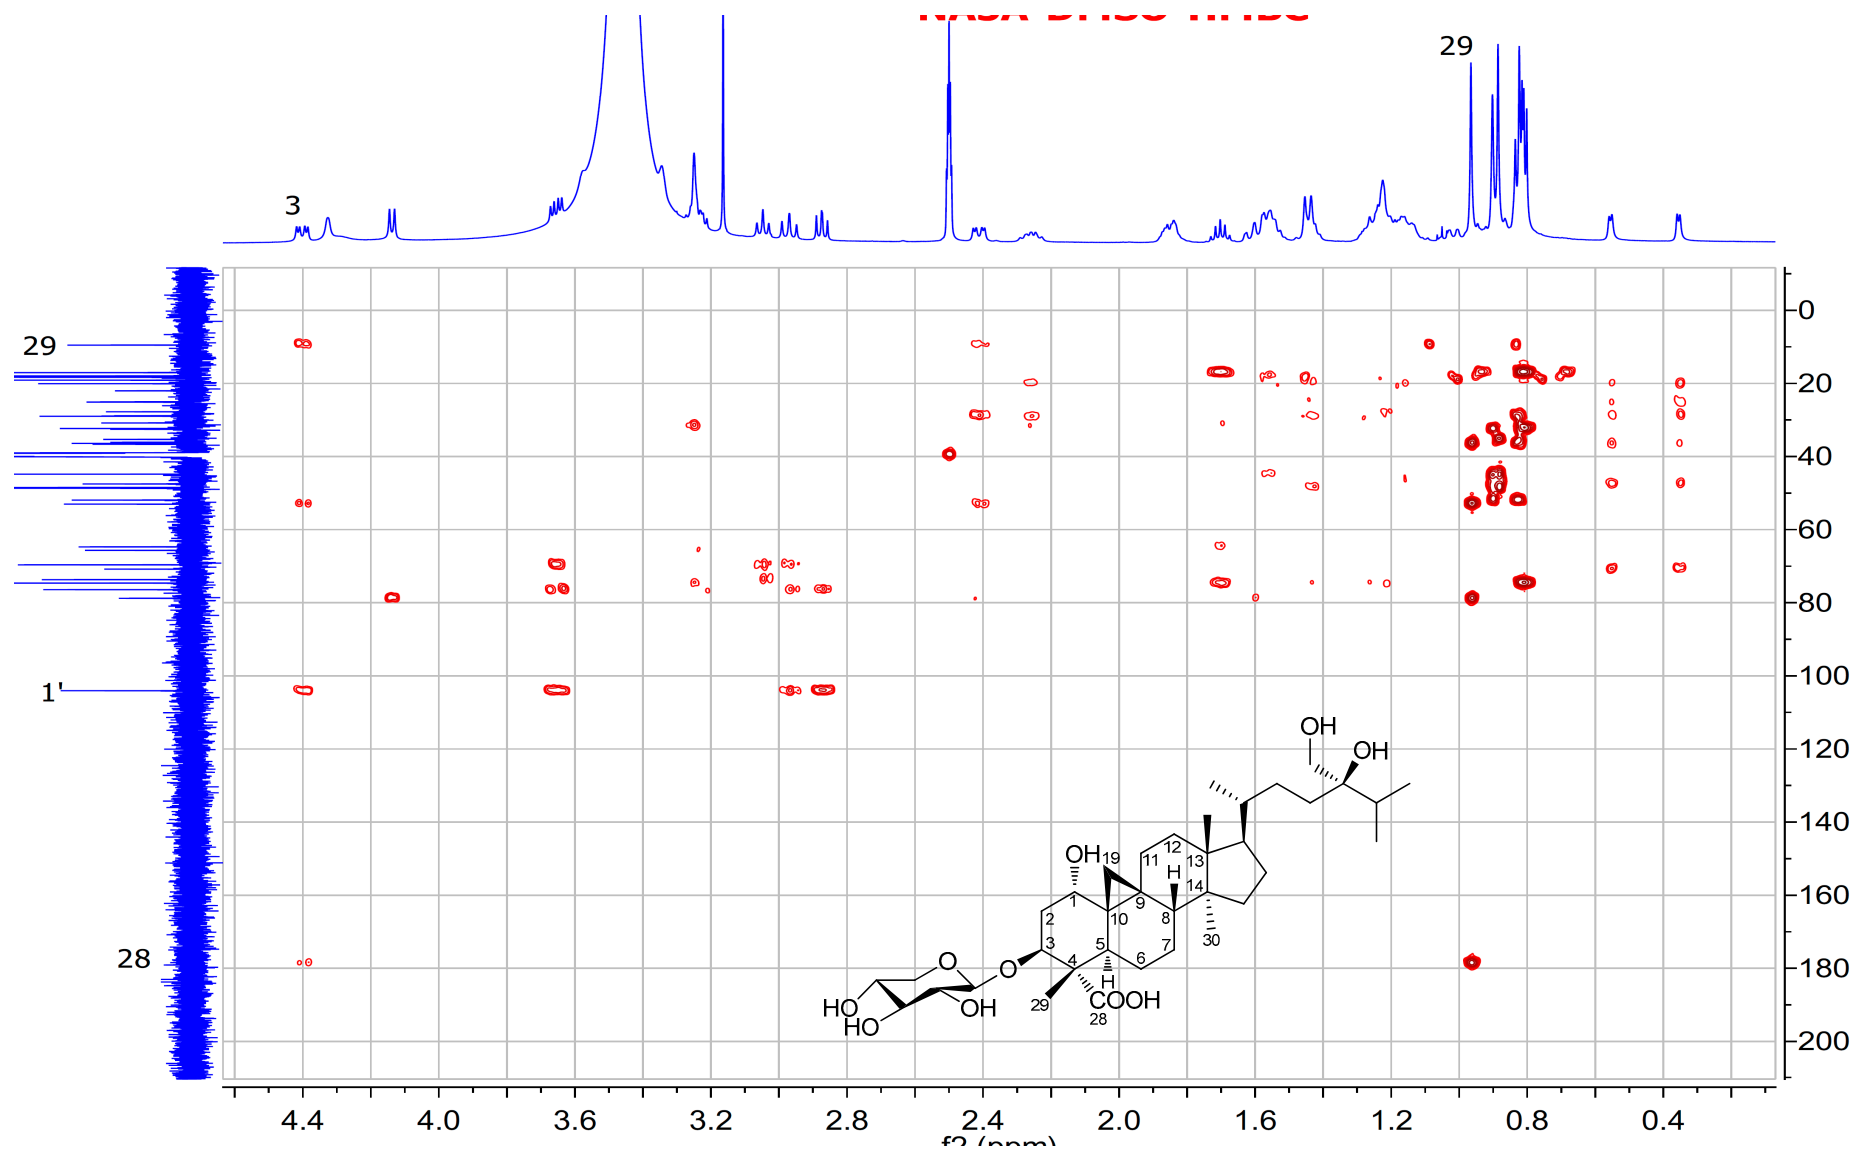

S8. HMBC spectrum of 1 (500/125 MHz, DMSO-*d*<sub>6</sub>)

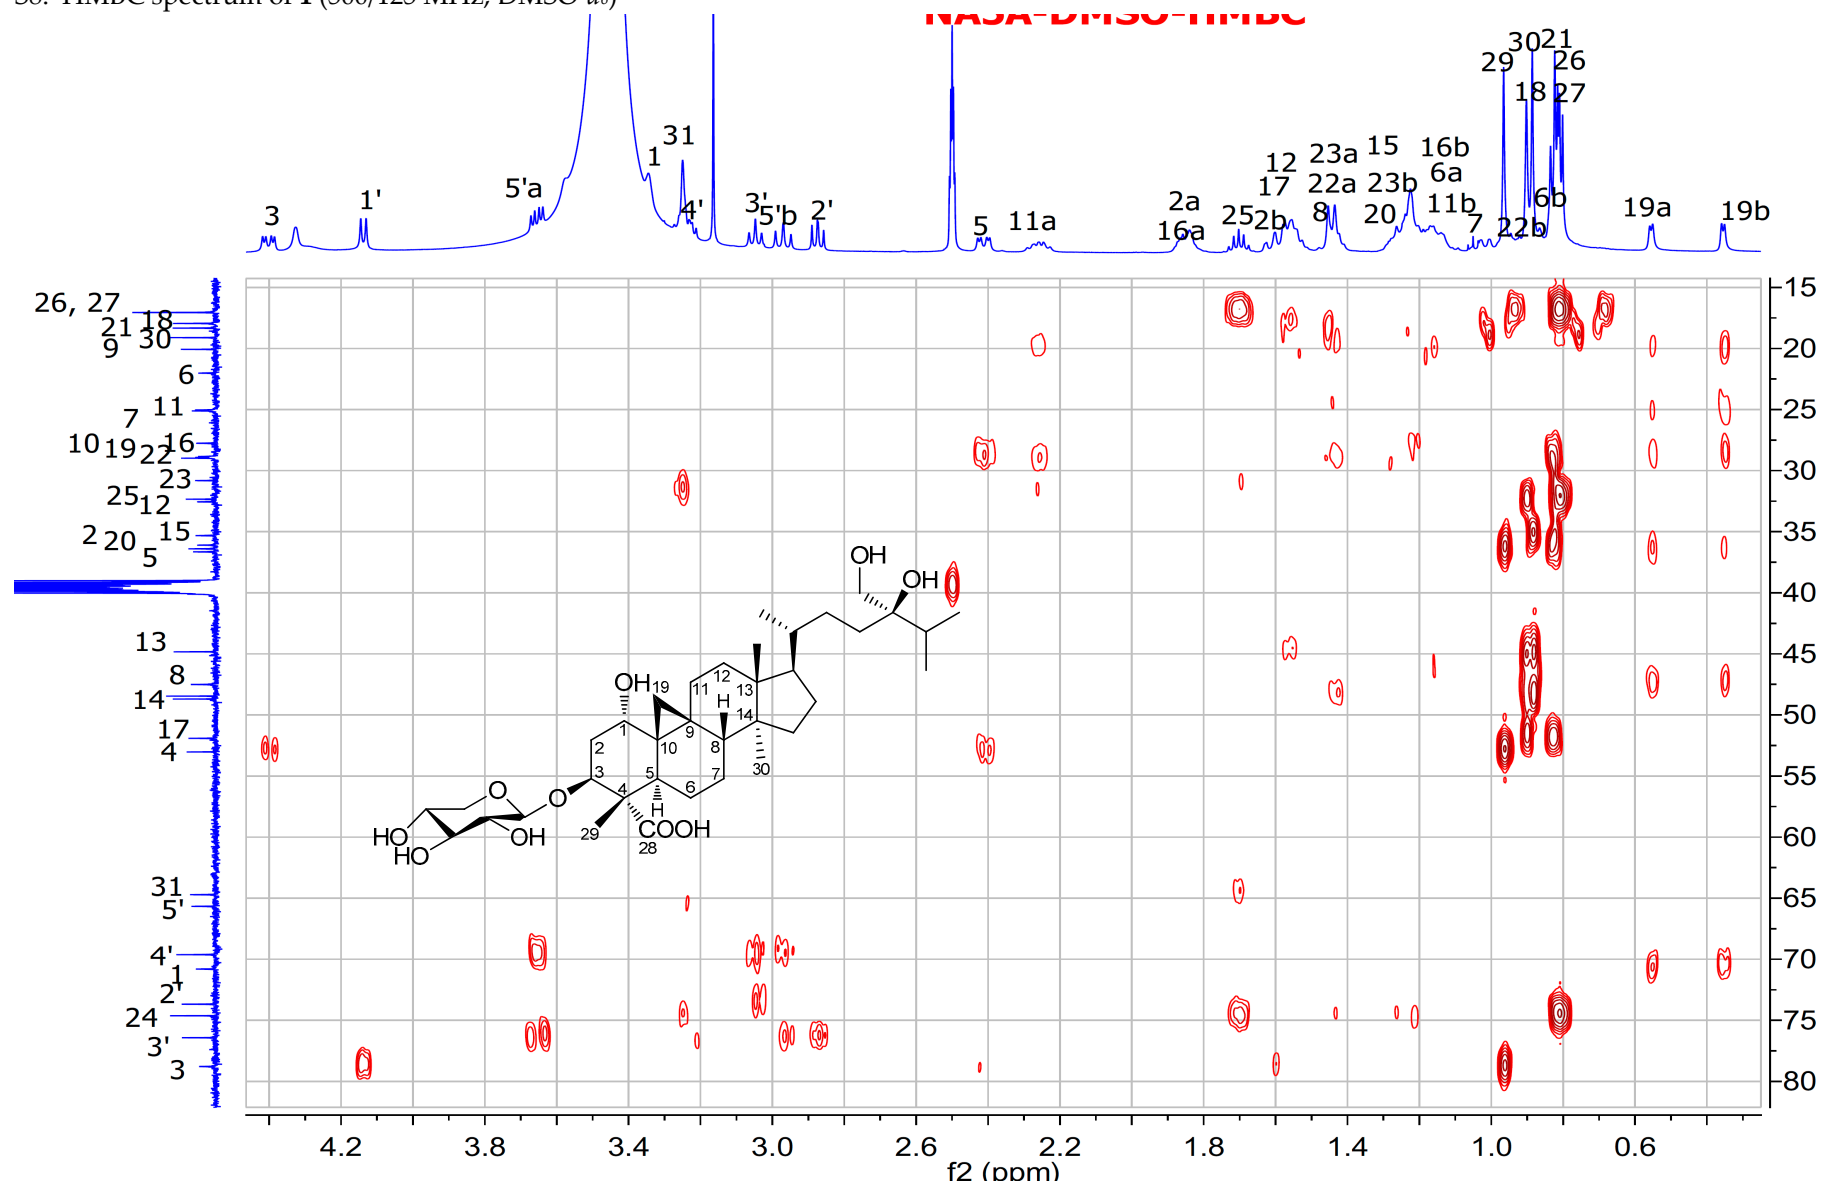

S9. NOESY spectrum of **1** (500 MHz, DMSO-*d*<sub>6</sub>)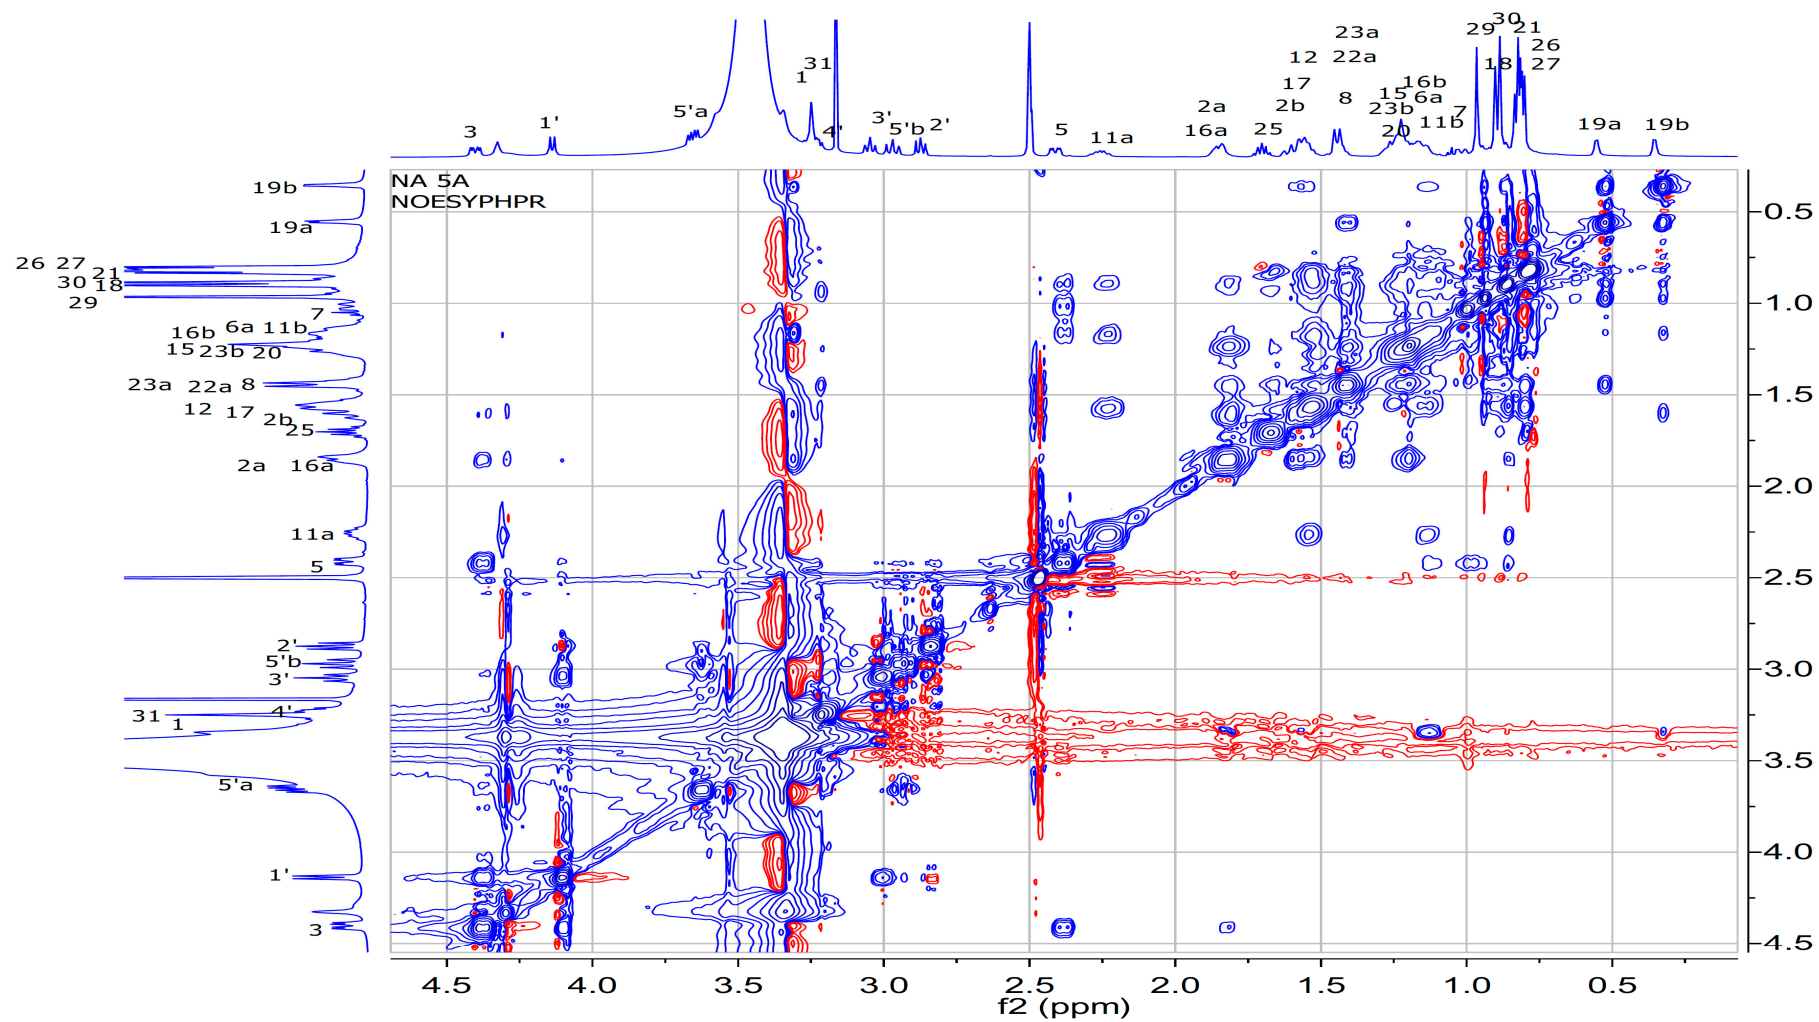

S10.  $^{13}\text{C}$  NMR spectrum of **1** (125 MHz, pyridine- $d_5$ )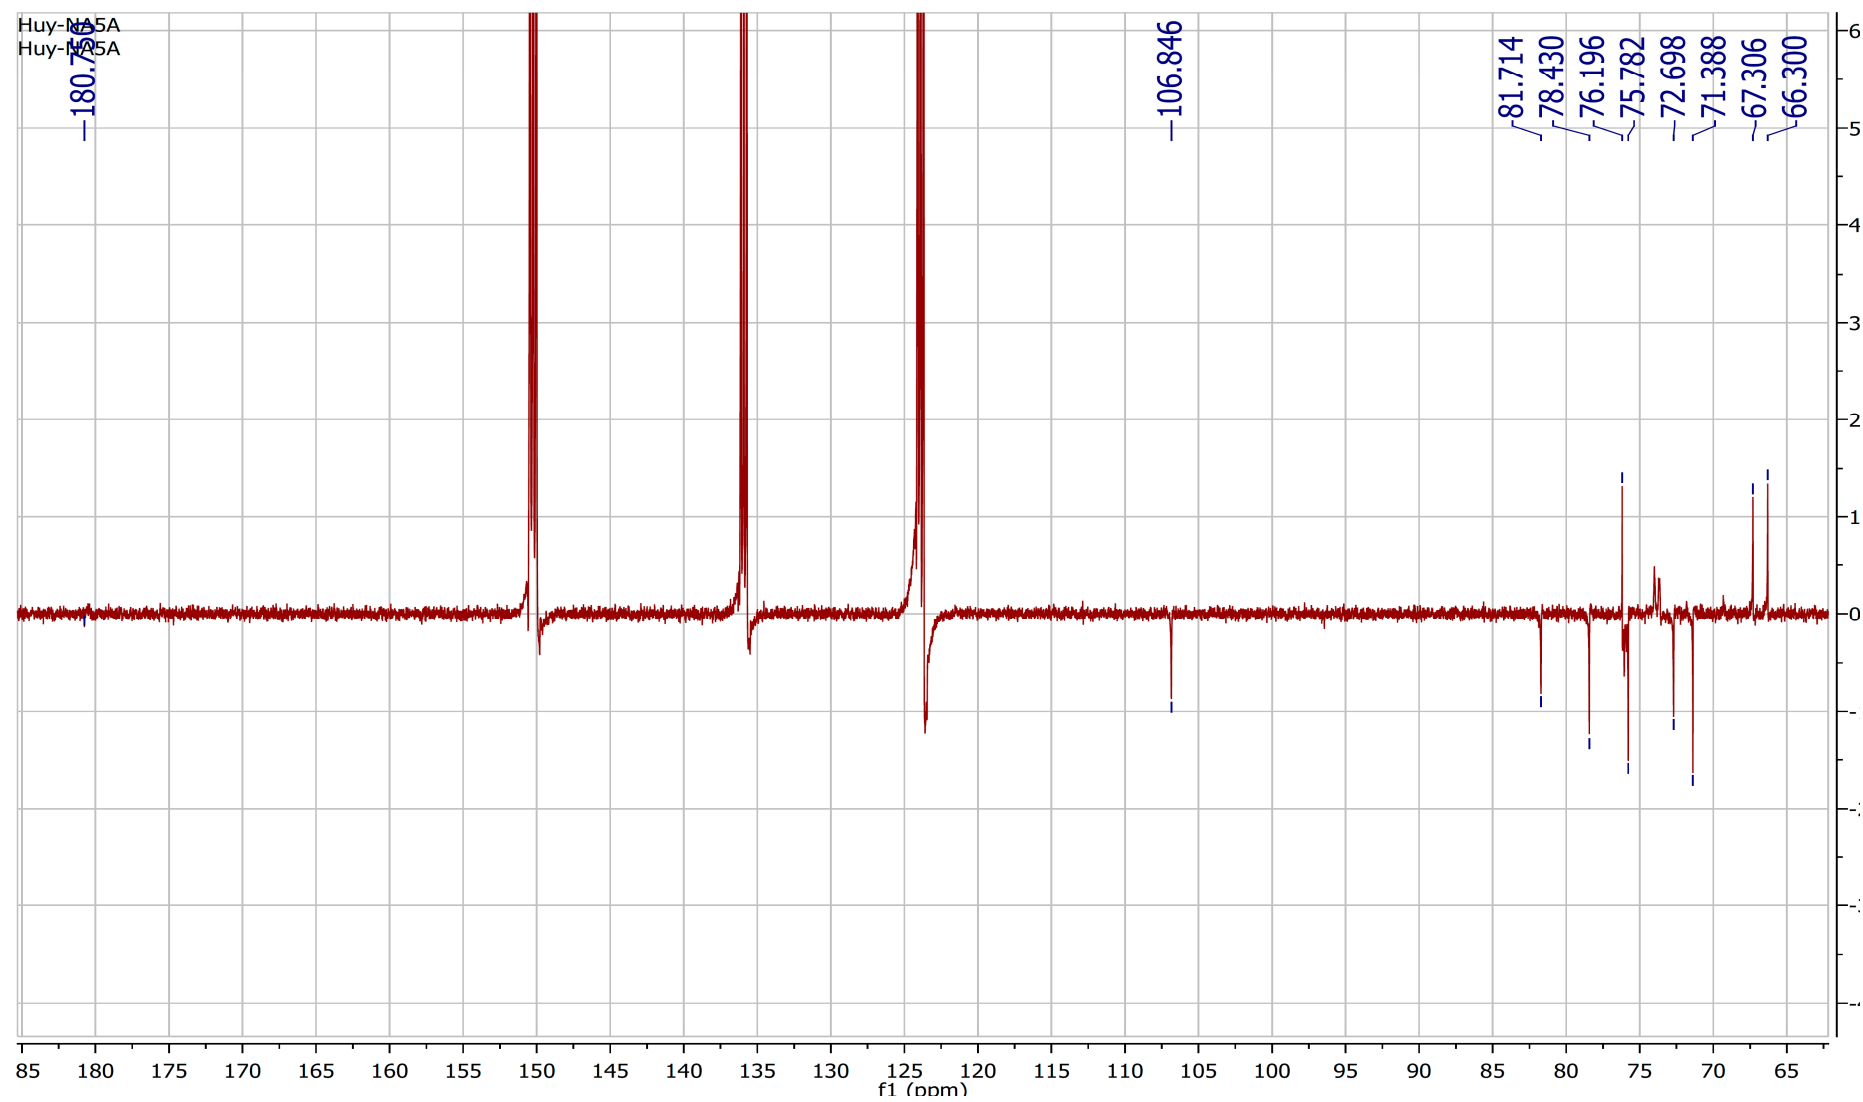

S11.  $^{13}\text{C}$  NMR spectrum of **1** (125 MHz, pyridine- $d_5$ )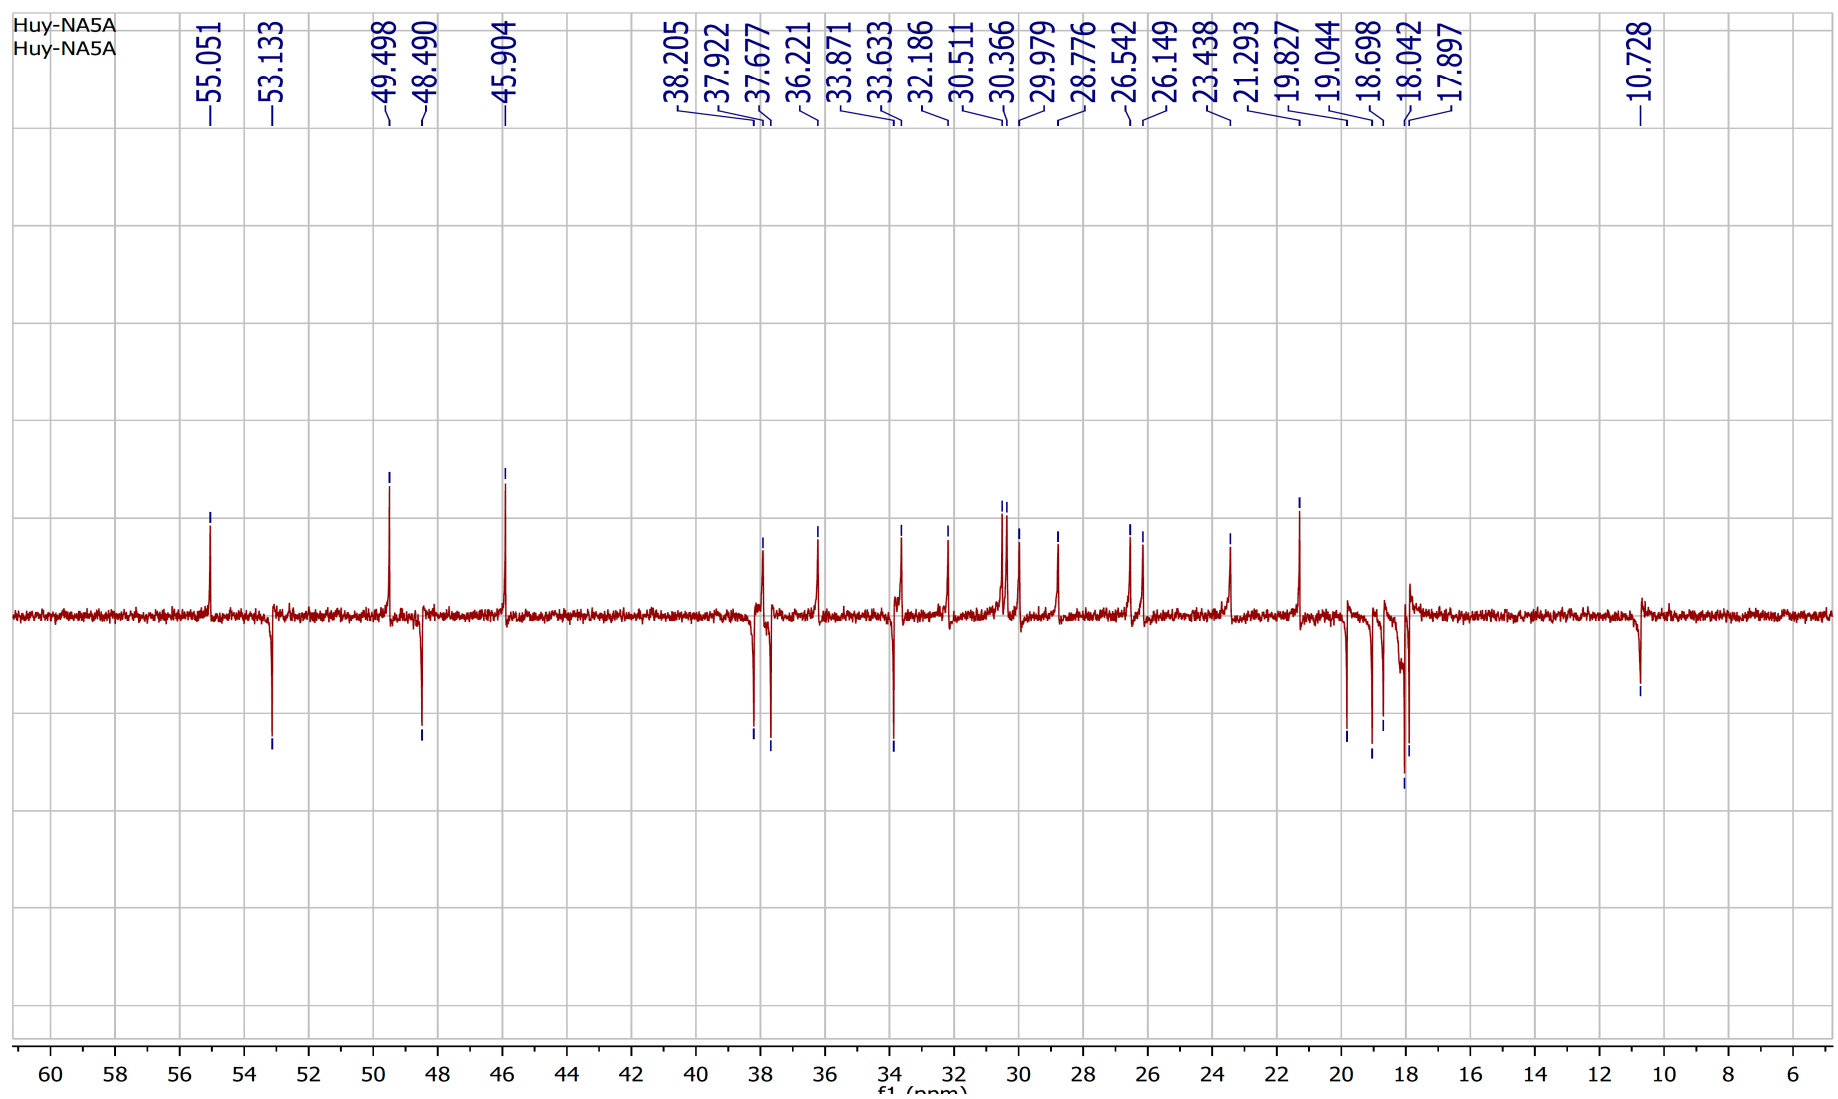

## S12. HRESIMS of 2

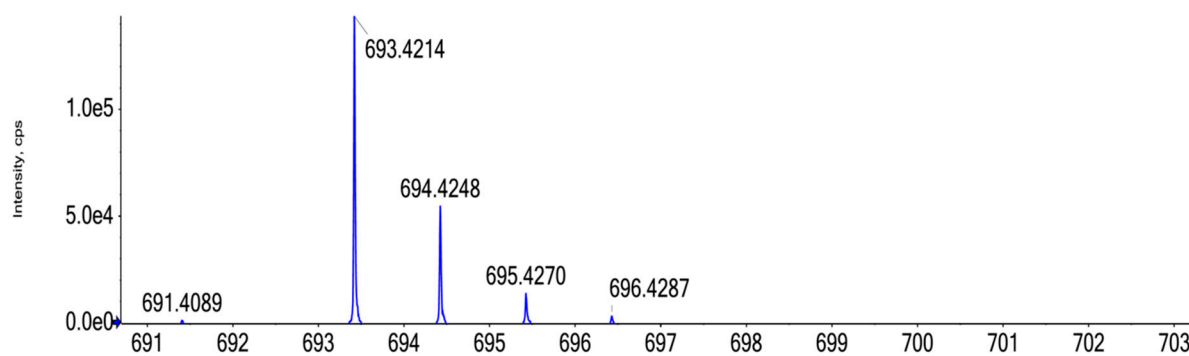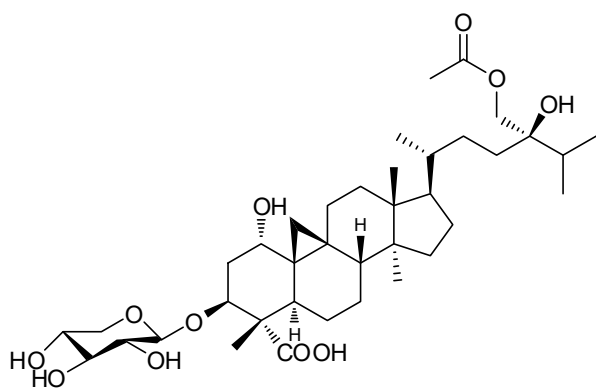

S13. <sup>1</sup>H-NMR spectrum of 2 (500 MHz, DMSO-d<sub>6</sub>)

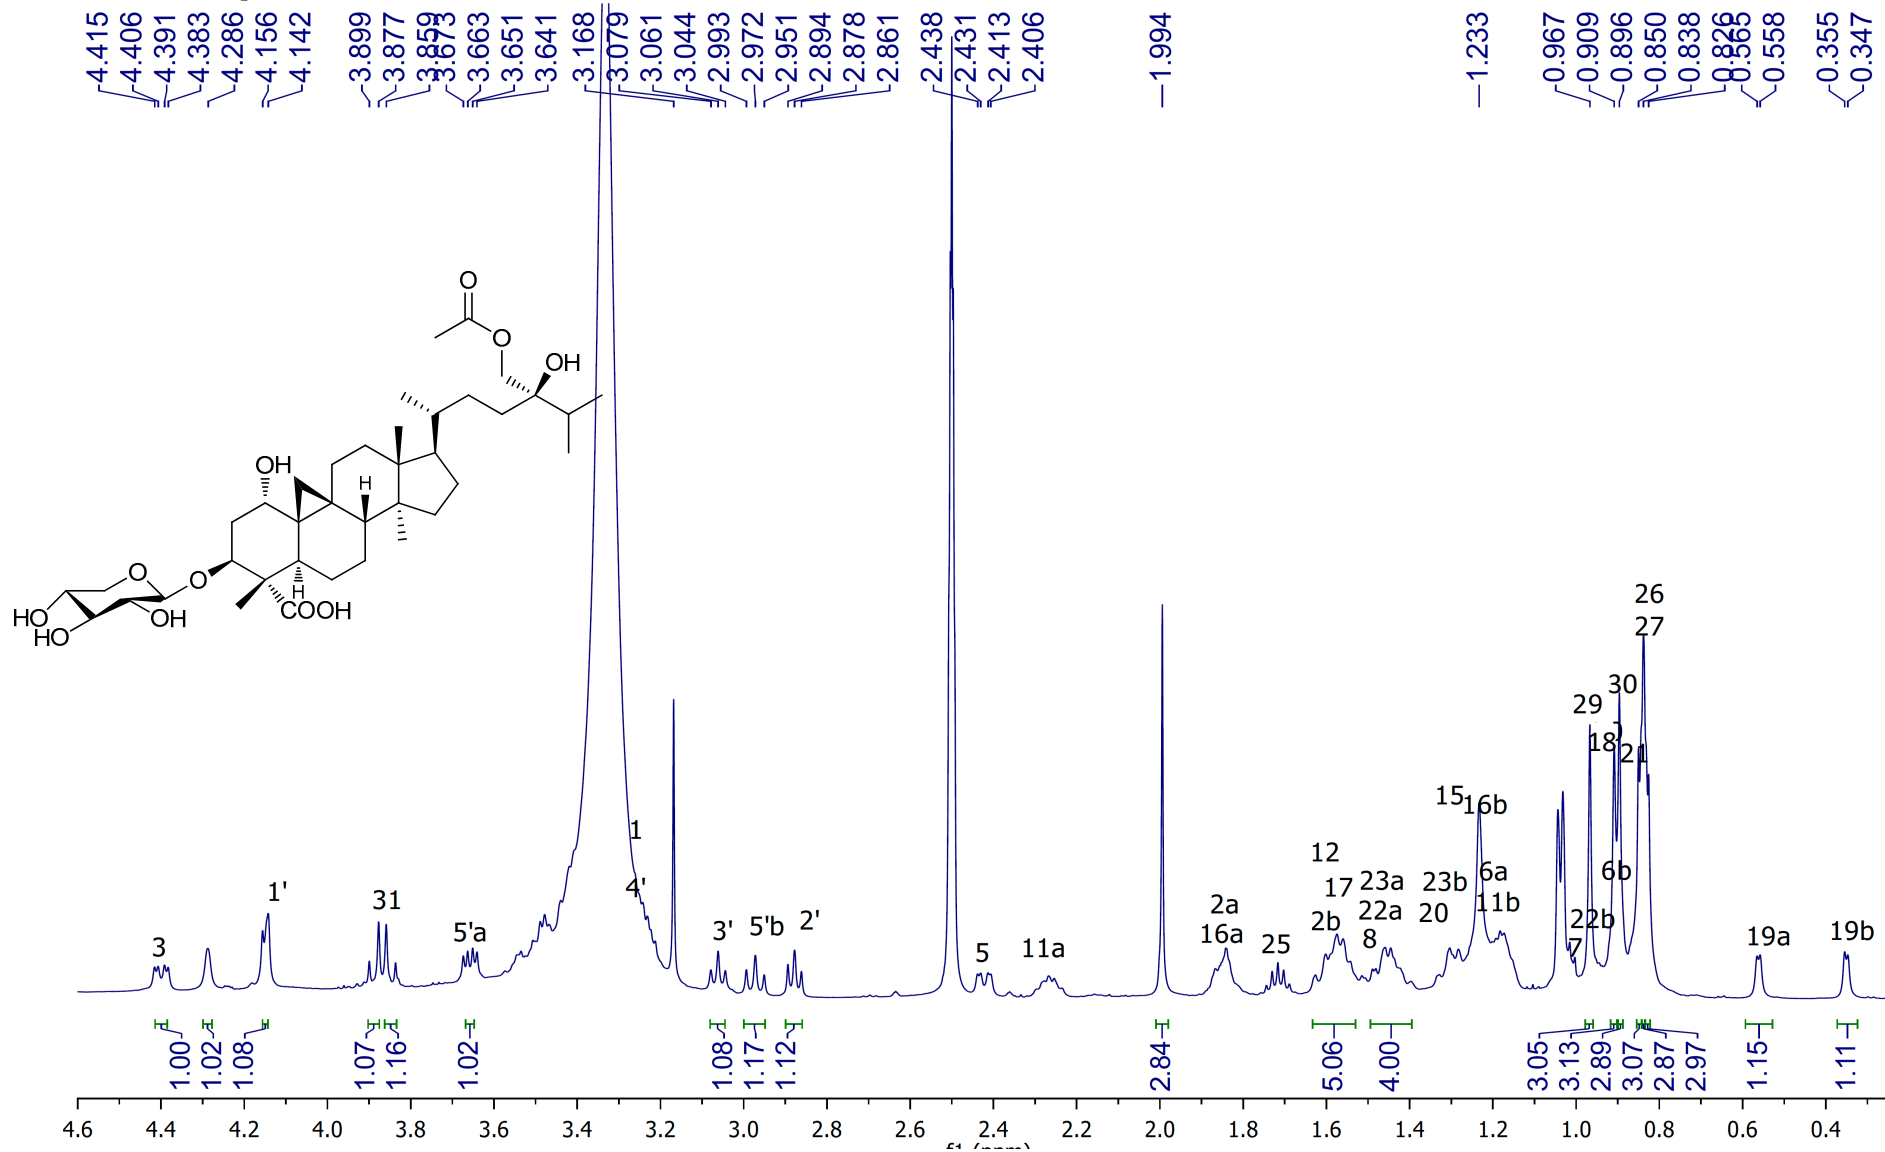

S14.  $^{13}\text{C}$ -NMR spectrum of **2** (125 MHz,  $\text{DMSO-}d_6$ )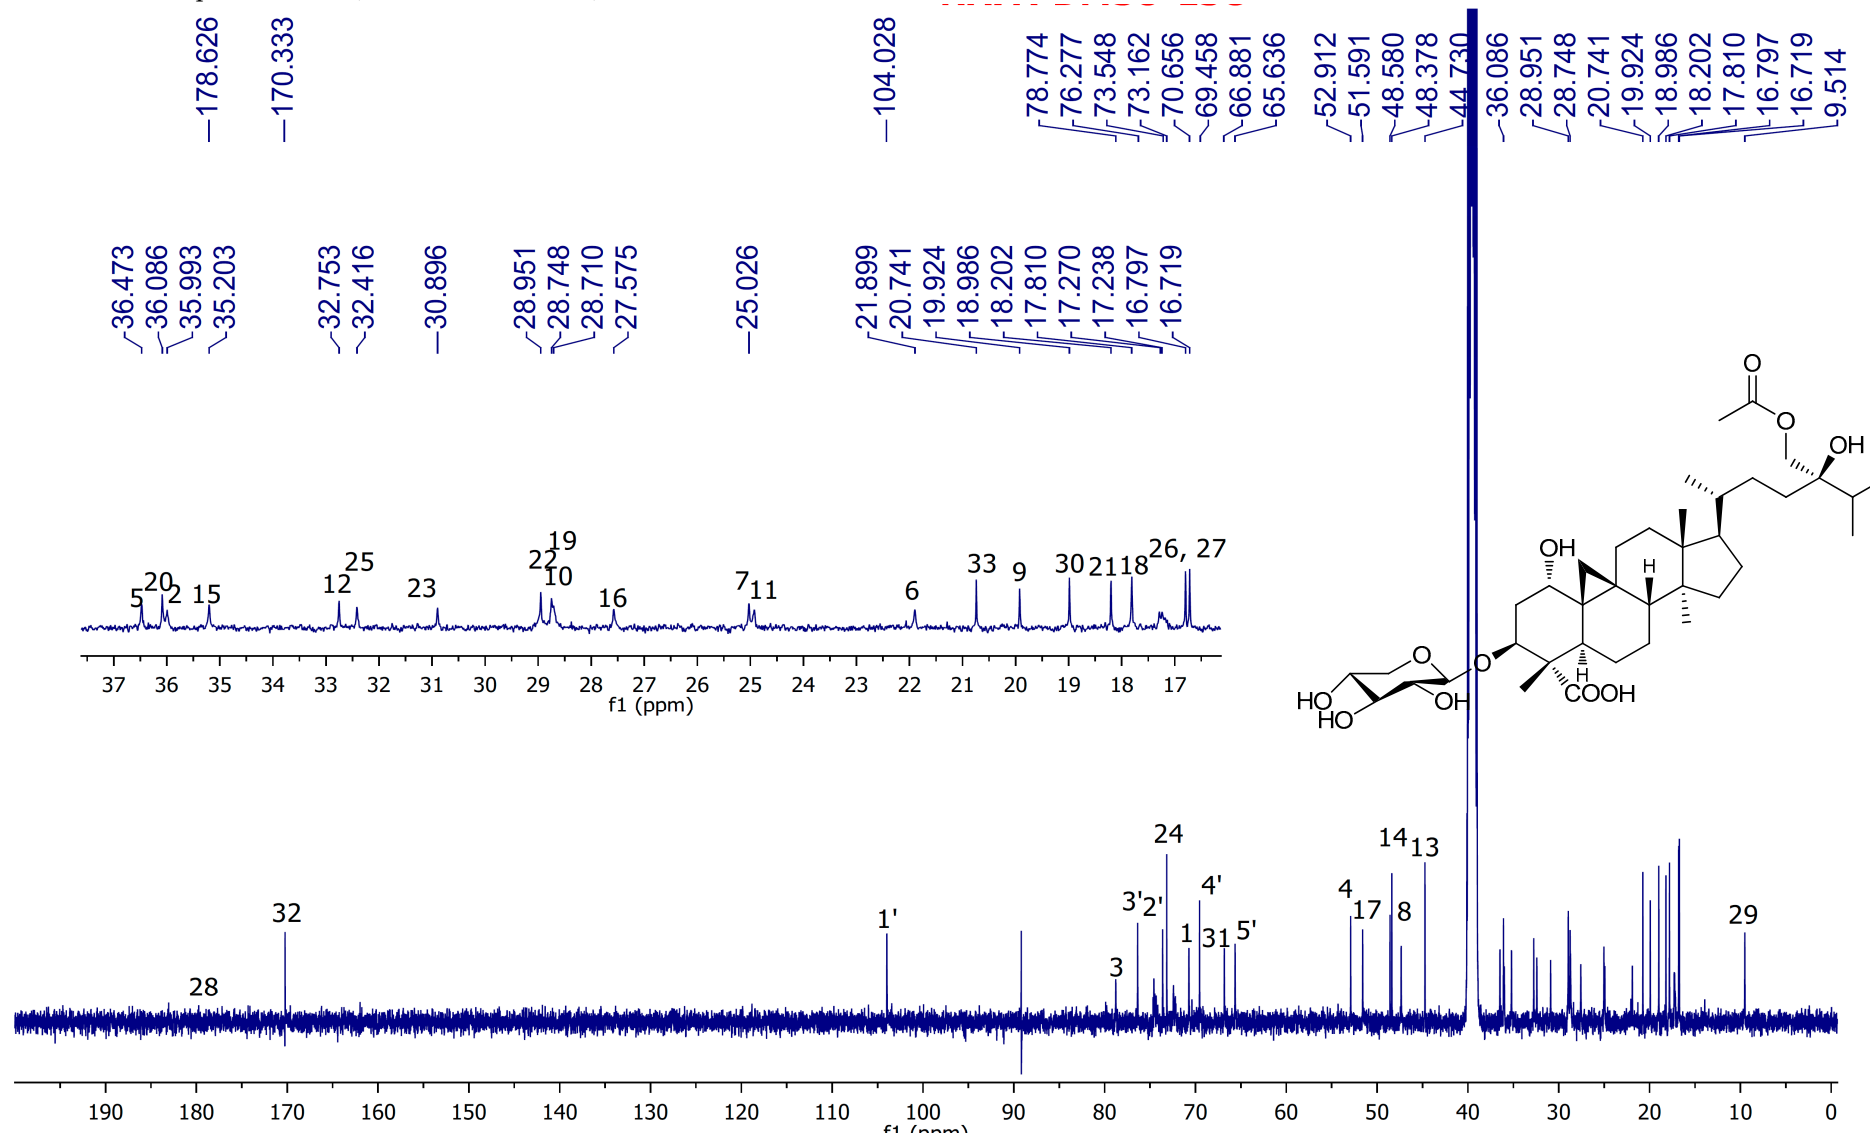



S15. COSY spectrum of 2 (500 MHz, DMSO-*d*<sub>6</sub>)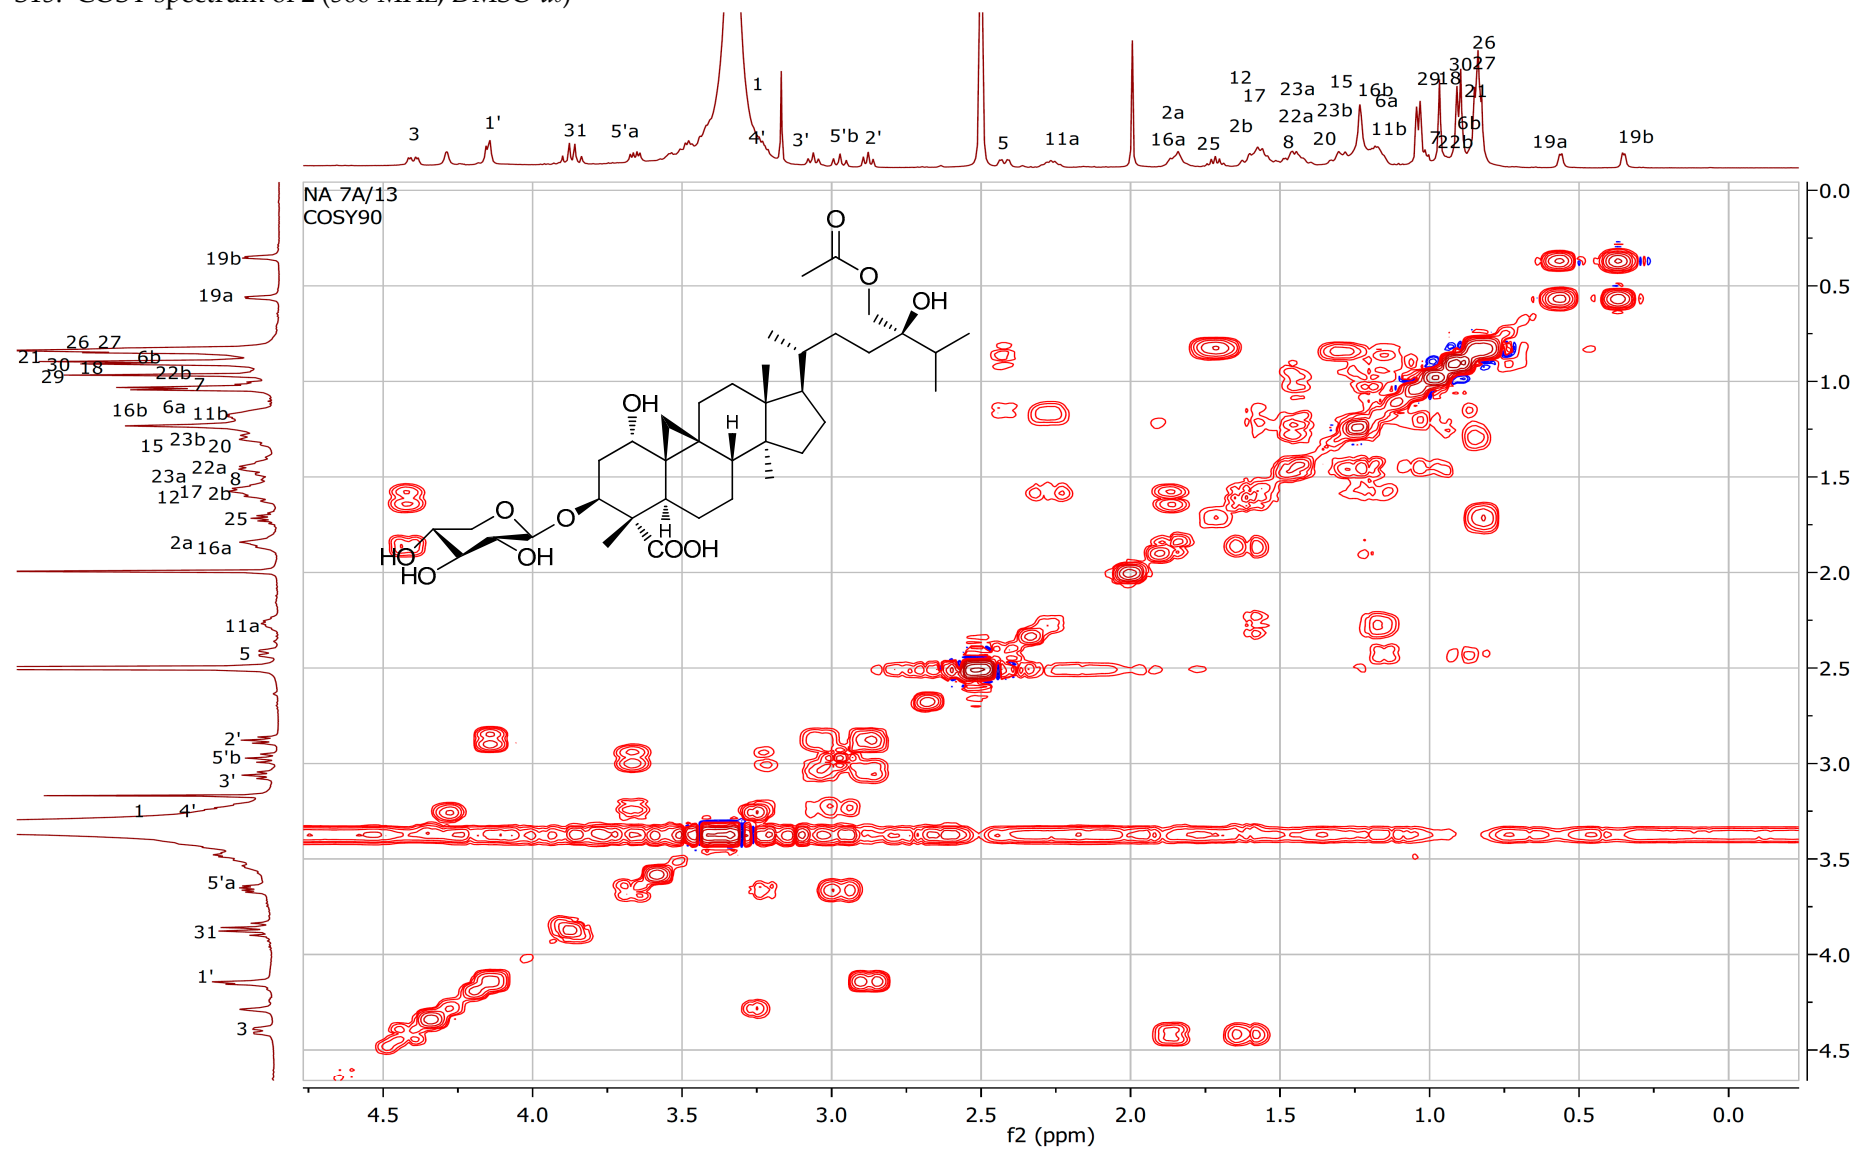

S16. HSQC spectrum of 2 (500/125 MHz, DMSO-*d*<sub>6</sub>)

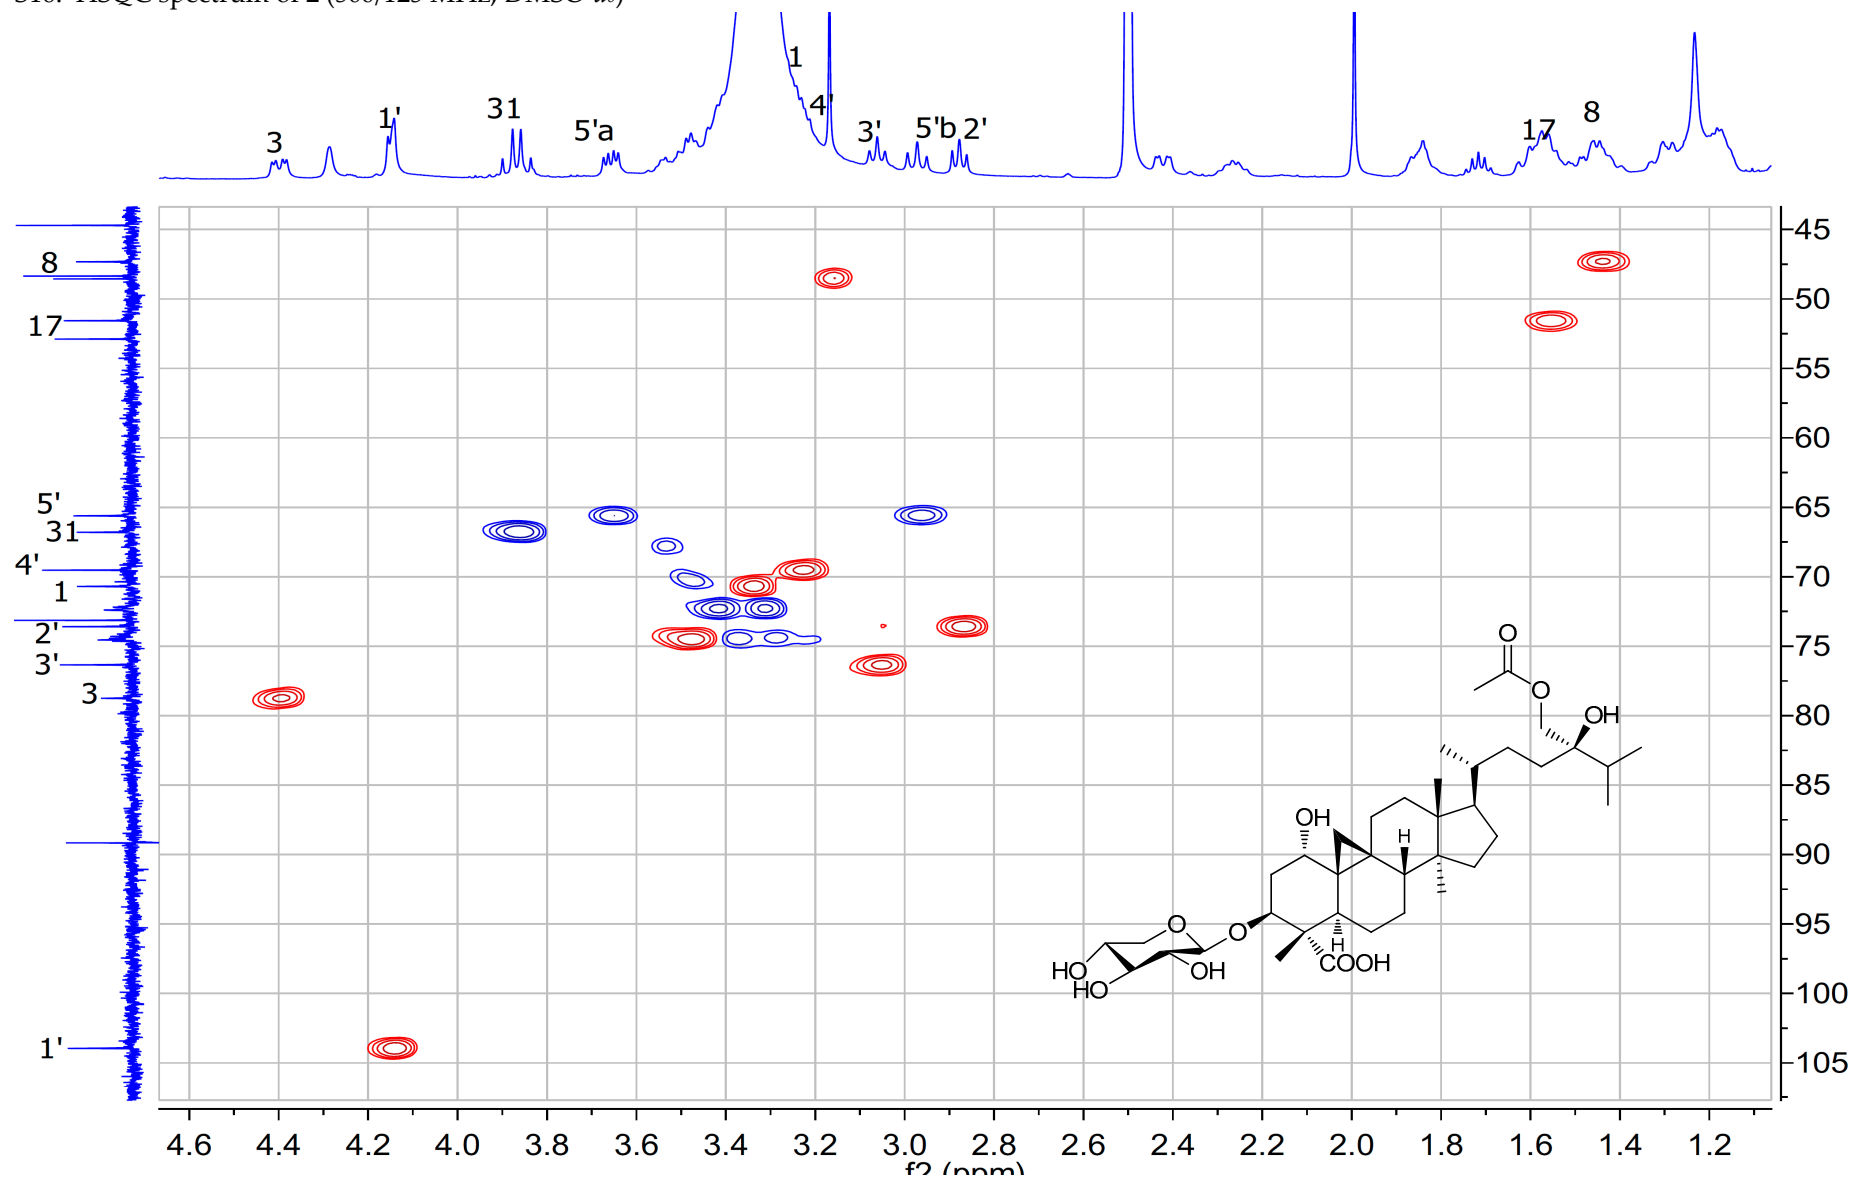

S17. HSQC spectrum of **2** (500/125 MHz, DMSO-*d*<sub>6</sub>)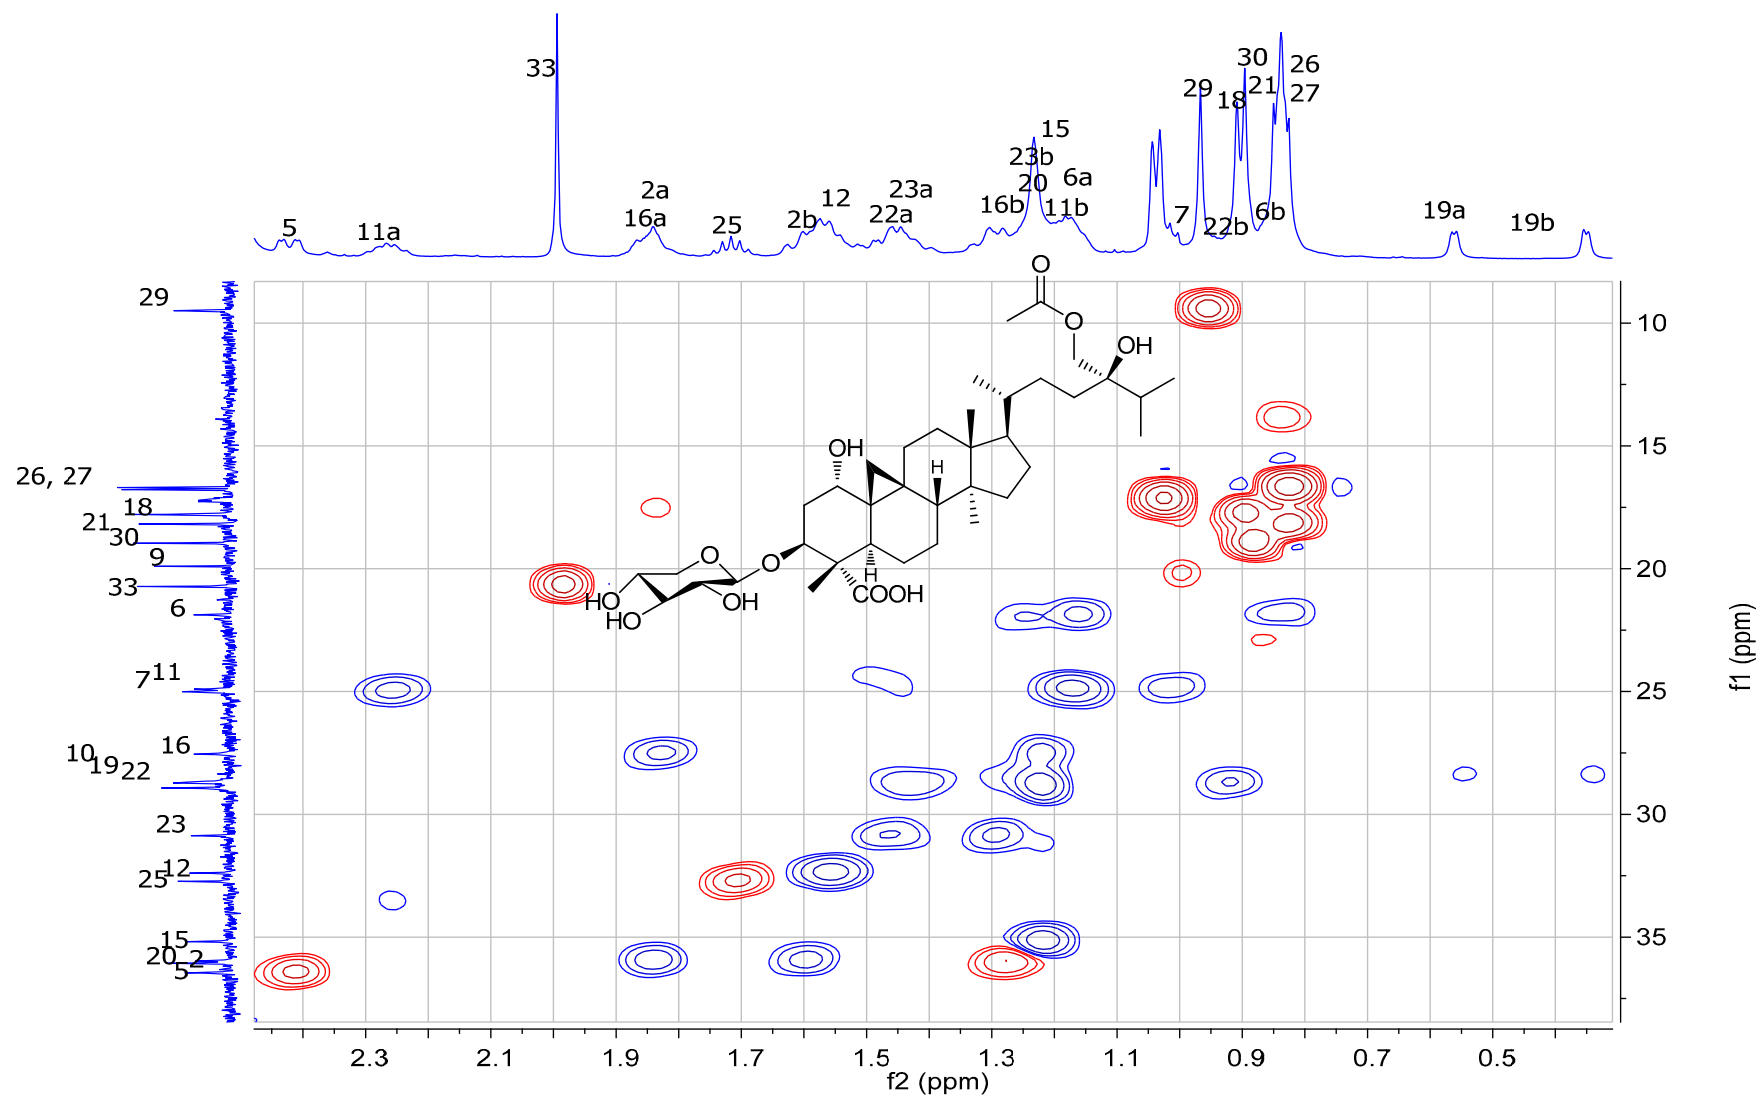

S18. HMBC spectrum of 2 (500/125 MHz, DMSO- $d_6$ )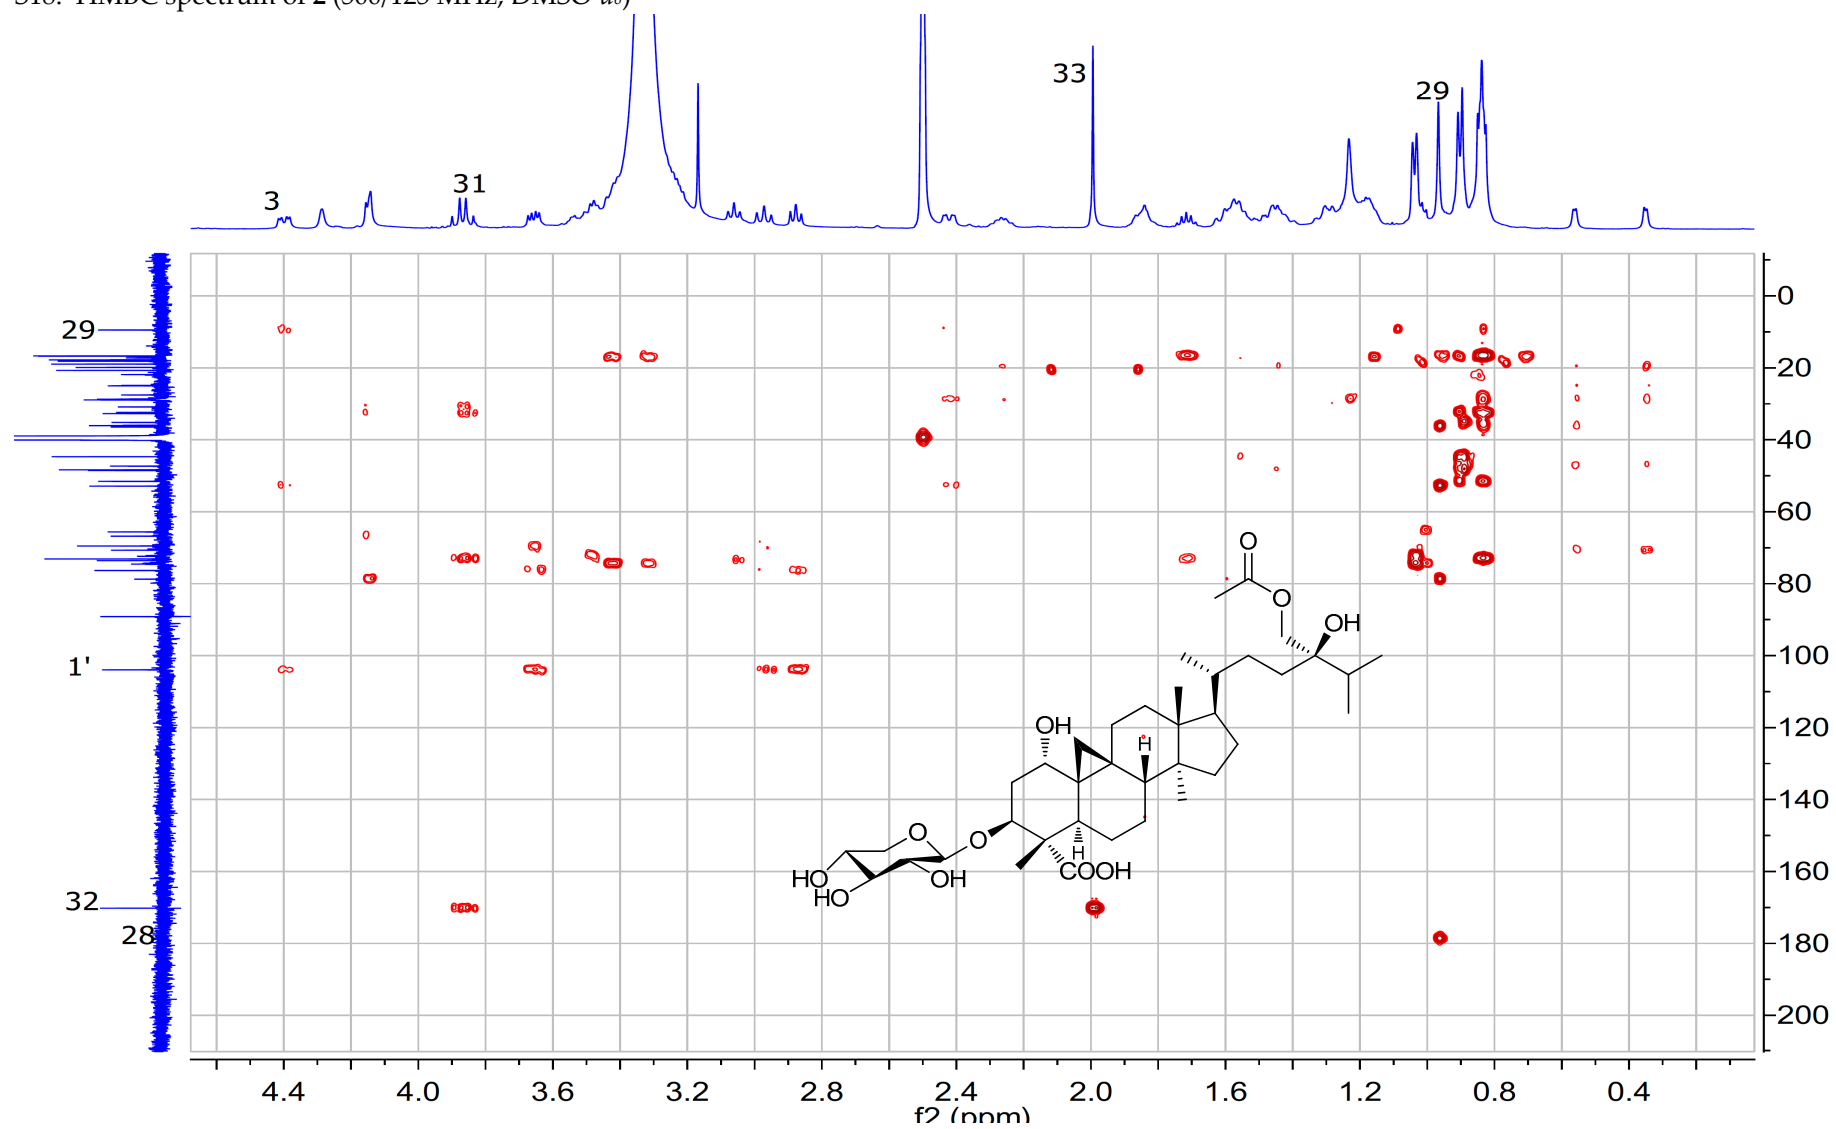

S19. HMBC spectrum of 2 (500/125 MHz, DMSO-*d*<sub>6</sub>)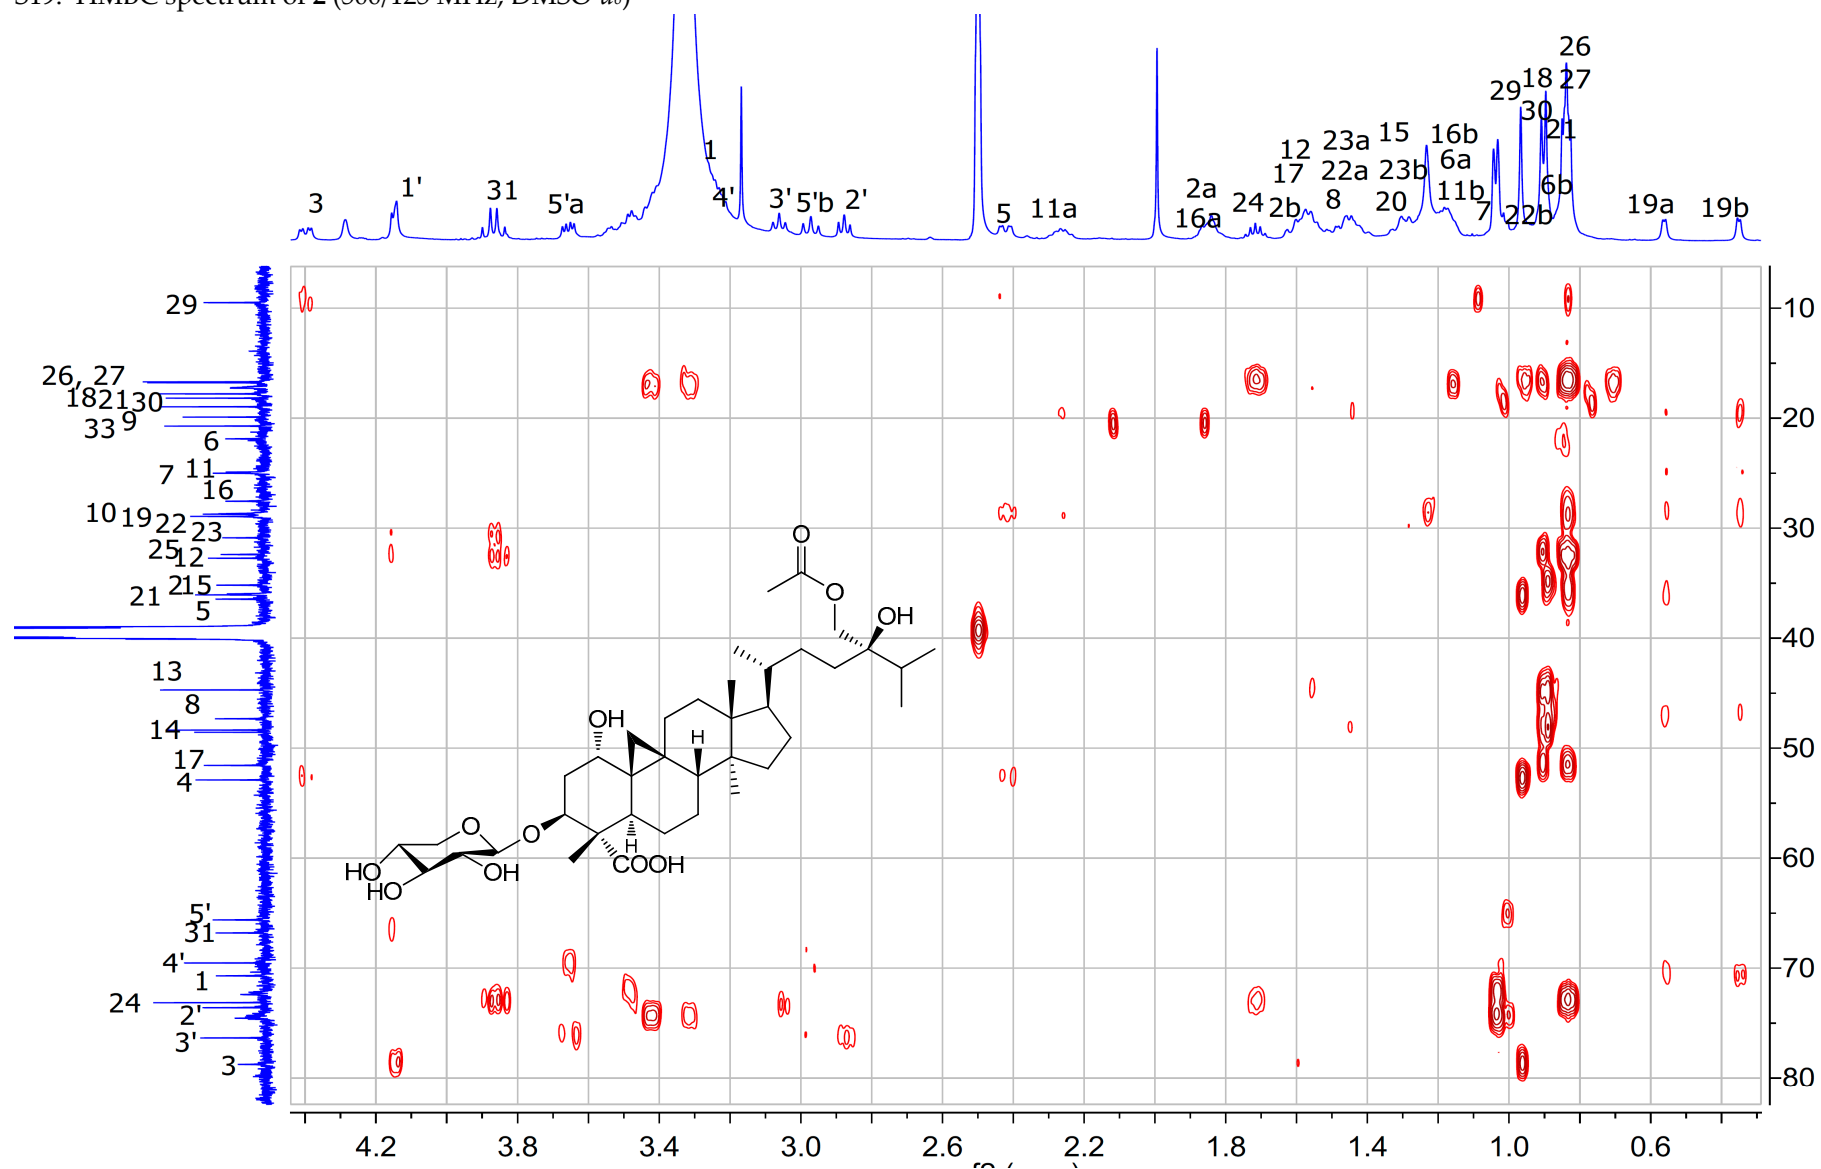

S20. NOESY spectrum of **2** (500/125 MHz, DMSO-*d*<sub>6</sub>)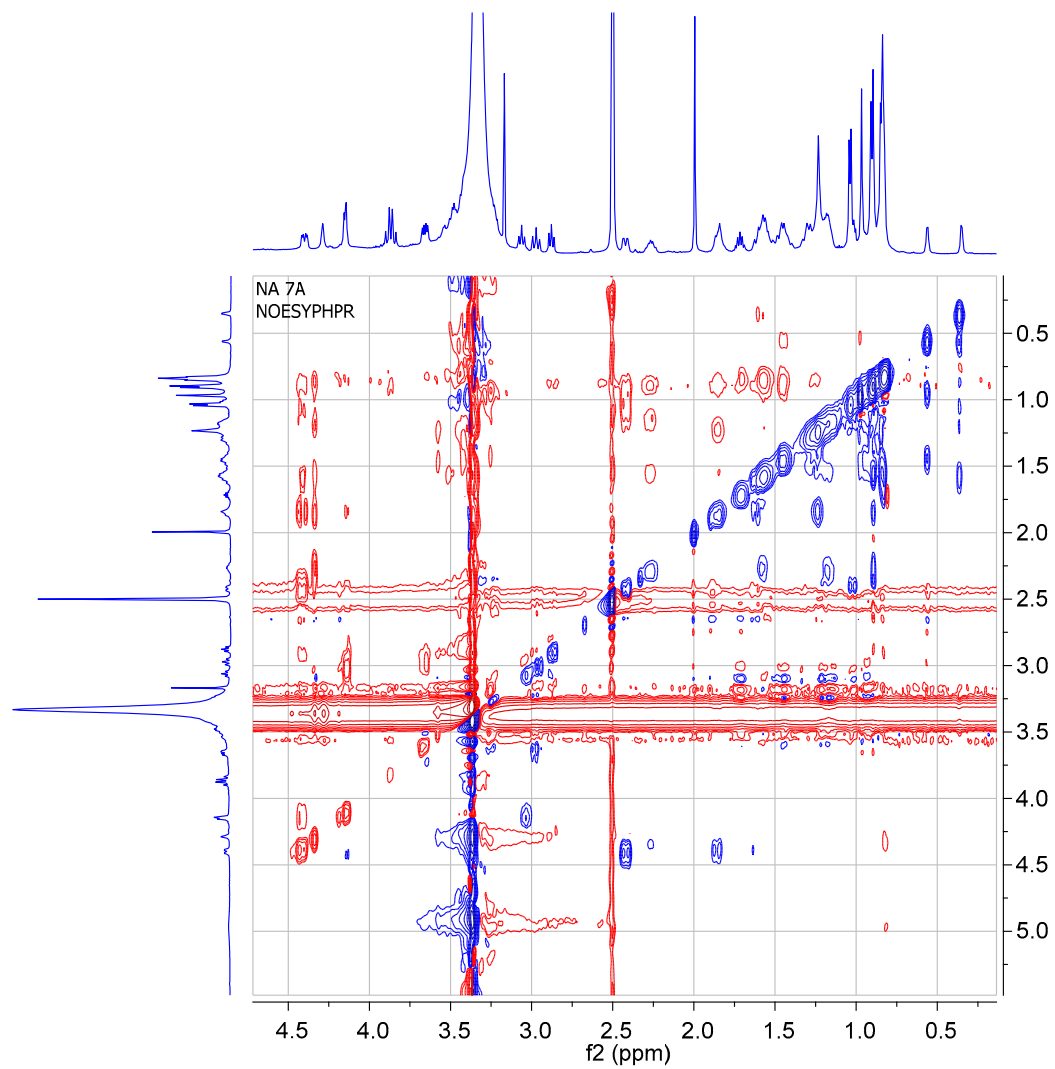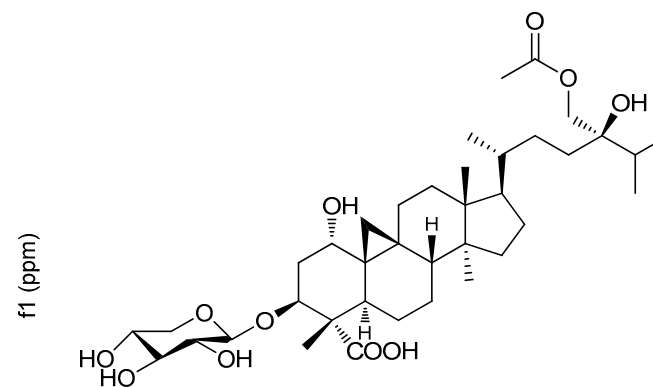

S21. DFT calculations results for 24R and 24S epimers of **1** and  $^{13}\text{C}$  NMR Spectroscopic Data (125 MHz) for **1** in DMSO- $d_6$  ( $\delta$  in ppm)

| Position | <b>1</b> (24R) | 24S   | Experimental shifts |
|----------|----------------|-------|---------------------|
| C-8      | 34.20          | 34.32 | 47.5                |
| C-9      | 21.14          | 21.26 | 20.1                |
| C-11     | 21.52          | 21.68 | 25.0                |
| C-12     | 33.68          | 34.35 | 32.6                |
| C-13     | 47.83          | 47.63 | 44.8                |
| C-14     | 47.74          | 47.70 | 48.7                |
| C-15     | 38.68          | 38.63 | 35.3                |
| C-16     | 31.43          | 31.12 | 27.8                |
| C-17     | 50.26          | 49.93 | 51.9                |
| C-18     | 21.54          | 21.97 | 18.0                |
| C-20     | 36.99          | 36.80 | 36.4                |
| C-21     | 21.25          | 20.86 | 18.3                |
| C-22     | 27.85          | 28.84 | 29.0                |
| C-23     | 27.88          | 23.13 | 30.8                |
| C-24     | 75.23          | 75.65 | 74.6                |
| C-25     | 33.23          | 35.41 | 32.3                |
| C-26     | 17.82          | 18.82 | 17.1                |
| C-27     | 17.76          | 17.27 | 17.1                |
| C-30     | 27.82          | 27.92 | 19.1                |
| C-31     | 65.45          | 65.74 | 64.7                |

## S22. Atomic Coordinates (Ångstroms) of Nerviside I (1) and Epinerviside I

## Nerviside I (1)

Electronic energy (B3LYP) : -935.439635459 Ha

Lowest frequency : 7.8467 cm<sup>-1</sup>

Free energy : -934.935414 Ha

|   |          |          |          |
|---|----------|----------|----------|
| C | -4.29216 | -1.19131 | -0.06448 |
| H | -4.90901 | -0.75227 | -0.85830 |
| C | -3.56646 | -2.44989 | -0.62855 |
| C | -2.10779 | -2.61167 | -0.15910 |
| H | -1.64381 | -3.42740 | -0.72682 |
| H | -2.11295 | -2.95420 | 0.88220  |
| C | -1.22334 | -1.33200 | -0.28135 |
| H | -0.55406 | -1.29149 | 0.58514  |
| H | -0.56230 | -1.43276 | -1.14721 |
| C | -2.03245 | -0.01247 | -0.38870 |
| C | -3.32821 | -0.11951 | 0.49828  |
| C | -3.86115 | 1.33034  | 0.47959  |
| H | -4.51481 | 1.53908  | 1.33461  |
| H | -4.45951 | 1.51162  | -0.42041 |
| C | -2.58636 | 2.21889  | 0.48028  |
| H | -2.46005 | 2.74480  | 1.43241  |
| H | -2.66468 | 2.99654  | -0.28885 |
| C | -1.36166 | 1.28390  | 0.19088  |
| H | -0.90807 | 1.01025  | 1.15202  |
| C | -2.38873 | 0.24154  | -1.87770 |
| H | -1.47282 | 0.29949  | -2.47506 |
| H | -2.93291 | 1.17966  | -2.02765 |
| H | -2.99424 | -0.55909 | -2.30741 |
| C | -0.26576 | 2.01466  | -0.62904 |
| H | -0.72170 | 2.32146  | -1.58153 |
| C | 0.17326  | 3.30929  | 0.08564  |
| H | 0.54283  | 3.10685  | 1.09846  |
| H | -0.64925 | 4.02533  | 0.17535  |
| H | 0.98100  | 3.80353  | -0.46888 |
| C | 0.97533  | 1.16690  | -1.00732 |
| H | 0.66817  | 0.27446  | -1.55844 |
| H | 1.56486  | 1.77352  | -1.70935 |
| C | 1.87212  | 0.73348  | 0.16683  |
| H | 2.34706  | 1.61271  | 0.61777  |
| H | 1.25005  | 0.28379  | 0.94690  |
| C | 2.97021  | -0.29102 | -0.18247 |
| C | 3.88527  | 0.22995  | -1.30457 |
| C | 3.81258  | -0.72107 | 1.06659  |
| C | 4.67605  | 0.39758  | 1.67392  |
| H | 5.24870  | 0.00545  | 2.52271  |
| H | 4.06739  | 1.22792  | 2.05202  |
| H | 5.39835  | 0.80302  | 0.95763  |
| C | 2.94780  | -1.38369 | 2.15103  |
| H | 2.27918  | -2.13032 | 1.71398  |
| H | 2.33817  | -0.65126 | 2.69419  |
| H | 3.58629  | -1.88263 | 2.88966  |



|   |          |          |          |
|---|----------|----------|----------|
| C | -3.01558 | -0.45493 | 1.98304  |
| H | -3.96043 | -0.51308 | 2.53721  |
| H | -2.40952 | 0.31626  | 2.46820  |
| H | -2.50191 | -1.40920 | 2.11793  |
| O | 2.30175  | -1.45255 | -0.70077 |
| H | 3.00081  | -1.97310 | -1.13472 |
| O | 4.79455  | -0.82879 | -1.63187 |
| H | 4.42678  | 1.13395  | -0.99333 |
| H | 3.26987  | 0.47951  | -2.17686 |
| H | 5.19494  | -0.62910 | -2.49039 |
| H | 4.50191  | -1.48697 | 0.68758  |
| H | -4.99380 | -1.48765 | 0.72556  |
| H | -4.12690 | -3.35311 | -0.35767 |
| H | -3.58184 | -2.41853 | -1.72446 |

## 24S-nerviside I

Electronic energy (B3LYP) : -935.440289459 Ha

Lowest frequency : 24.8018 cm<sup>-1</sup>

Free energy : -934.934311 Ha

|   |          |          |          |
|---|----------|----------|----------|
| C | -4.28705 | -1.09550 | -0.36328 |
| H | -4.80887 | -0.61322 | -1.19900 |
| C | -3.53680 | -2.35255 | -0.89763 |
| C | -2.13667 | -2.57110 | -0.29147 |
| H | -1.63557 | -3.37197 | -0.84908 |
| H | -2.25526 | -2.96028 | 0.72654  |
| C | -1.21733 | -1.30968 | -0.25920 |
| H | -0.66575 | -1.31263 | 0.68870  |
| H | -0.45790 | -1.39343 | -1.04285 |
| C | -1.97913 | 0.03337  | -0.41074 |
| C | -3.36186 | -0.07004 | 0.33416  |
| C | -3.85624 | 1.39301  | 0.31432  |
| H | -4.59343 | 1.58886  | 1.10180  |
| H | -4.34980 | 1.62134  | -0.63704 |
| C | -2.56909 | 2.24620  | 0.48443  |
| H | -2.52956 | 2.72543  | 1.46824  |
| H | -2.55108 | 3.05910  | -0.25117 |
| C | -1.34129 | 1.29278  | 0.27795  |
| H | -0.98679 | 0.97484  | 1.26667  |
| C | -2.17222 | 0.34189  | -1.91916 |
| H | -1.19842 | 0.39546  | -2.41633 |
| H | -2.67587 | 1.29864  | -2.09108 |
| H | -2.74825 | -0.42741 | -2.43723 |
| C | -0.15801 | 2.02962  | -0.40504 |
| H | -0.52177 | 2.40176  | -1.37394 |
| C | 0.24962  | 3.26844  | 0.41863  |
| H | 1.10949  | 3.77245  | -0.04024 |
| H | 0.53329  | 2.99590  | 1.44273  |
| H | -0.56152 | 3.99991  | 0.48740  |
| C | 1.08899  | 1.16714  | -0.72265 |
| H | 0.81301  | 0.33130  | -1.37142 |
| H | 1.76776  | 1.79708  | -1.31483 |
| C | 1.84796  | 0.60724  | 0.48958  |
| H | 2.31399  | 1.42034  | 1.05968  |

|   |          |          |          |
|---|----------|----------|----------|
| H | 1.14638  | 0.12510  | 1.17861  |
| C | 2.92930  | -0.45128 | 0.13944  |
| C | 3.50612  | -1.02696 | 1.44751  |
| C | 4.03555  | 0.09523  | -0.80742 |
| C | 5.05372  | -0.98026 | -1.22642 |
| H | 5.66352  | -0.61297 | -2.06014 |
| H | 4.54621  | -1.89342 | -1.54601 |
| H | 5.74506  | -1.23403 | -0.41277 |
| C | 4.76013  | 1.33921  | -0.26681 |
| H | 5.30252  | 1.12465  | 0.66266  |
| H | 5.50006  | 1.68600  | -0.99740 |
| H | 4.07729  | 2.17218  | -0.07180 |
| C | -3.21239 | -0.46588 | 1.82923  |
| H | -4.20965 | -0.50272 | 2.28462  |
| H | -2.62824 | 0.26267  | 2.39954  |
| H | -2.75271 | -1.44532 | 1.97952  |
| O | 2.32070  | -1.54106 | -0.56960 |
| H | 1.83490  | -2.04358 | 0.10808  |
| O | 2.43386  | -1.71944 | 2.10334  |
| H | 3.89906  | -0.22702 | 2.09055  |
| H | 4.32001  | -1.72548 | 1.21906  |
| H | 2.81558  | -2.30756 | 2.77063  |
| H | 3.50133  | 0.38998  | -1.71965 |
| H | -5.07277 | -1.40019 | 0.33966  |
| H | -3.44089 | -2.28328 | -1.98743 |
| H | -4.14160 | -3.24980 | -0.71775 |
